# Supplementary material
Source: PubMed Central journal article supplement (PMC3493988)
Supplement: mmc1.pdf [file mmc1.pdf]

# THE LANCET

## Supplementary appendix

This appendix formed part of the original submission and has been peer reviewed. We post it as supplied by the authors.

Supplement to: Pearse RM, Moreno RP, Bauer P, et al, for the European Surgical Outcomes Study (EuSOS) group for the Trials groups of the European Society of Intensive Care Medicine and the European Society of Anaesthesiology. Mortality after surgery in Europe: a 7 day cohort study. *Lancet* 2012; **380**: 1059–65.

# Variations in mortality for surgical patients across 28 European nations: An international seven day cohort study

**Rupert M. Pearse,<sup>1</sup> Rui P. Moreno,<sup>2</sup> Peter Bauer,<sup>3</sup> Paolo Pelosi,<sup>4</sup> Philipp Metnitz,<sup>5</sup> Claudia Spies,<sup>6</sup> Benoit Vallet,<sup>7</sup> Jean-Louis Vincent,<sup>8</sup> Andreas Hoeft,<sup>9</sup> and Andrew Rhodes<sup>10</sup> for the European Surgical Outcomes Study (EuSOS) group for the Trials groups of the European Society of Intensive Care Medicine and the European Society of Anaesthesiology\***

**\*see appendix**

1. *Reader (Associate Professor), Barts & The London School of Medicine and Dentistry, Queen Marys University of London, UK EC1M 6BQ*
2. *Professor, UCINC, Hospital de São José, Centro Hospitalar de Lisboa Central, E.P.E., Lisbon, Portugal*
3. *Professor, Medical University of Vienna, Austria*
4. *Professor, IRCCS AOU San Martino-IST, Department of Surgical Sciences and Integrated Diagnostics, University of Genoa, Italy*
5. *Associate Professor, Dept. of Anaesthesia & General Intensive Care AKH Wien, Medical University of Vienna, Austria*
6. *Professor, Charité-Universitaetsmedizin, Berlin, Germany*
7. *Professor, Anaesthesiology and Critical Care, University Hospital, Lille Nord de France*
8. *Professor, Erasme Hospital, Université Libre de Bruxelles, Belgium*
9. *Professor, Department of Anaesthesiology, University of Bonn, Germany*
10. *Reader (Associate Professor), St George's Healthcare NHS Trust and St George's University of London, UK*

Correspondence to:

Rupert Pearse,

Adult Critical Care Unit,

Royal London Hospital,

London

E1 1BB

United Kingdom

e-mail: r.pearse@qmul.ac.uk Tel: +44 20 3594 0346

**Supplementary table 1. Percentage of patients presenting with co-existent diseases and proportions of procedures categorized as minor, intermediate or major per country.** COPD, chronic obstructive pulmonary disease; CAD, coronary artery disease; IDDM, diabetes mellitus taking insulin; NIDDM, diabetes mellitus not taking insulin.

|                | Co-morbid factors (% of patients) |           |               |      |      |      |       |        |        | Hospital factors |                       |                            | Grade of Surgery (% of patients) |               |       |
|----------------|-----------------------------------|-----------|---------------|------|------|------|-------|--------|--------|------------------|-----------------------|----------------------------|----------------------------------|---------------|-------|
|                | Smoker                            | Cirrhosis | Heart failure | COPD | CAD  | IDDM | NIDDM | Cancer | Stroke | n                | Patients per hospital | University hospitals n (%) | Minor                            | Inter-mediate | Major |
| Belgium        | 21.4                              | 1.5       | 5.9           | 12.4 | 13.2 | 5.0  | 7.9   | 7.1    | 4.2    | 16               | 93                    | 7 (44%)                    | 32.1                             | 42.3          | 25.7  |
| Croatia        | 22.4                              | 1.6       | 4.7           | 6.6  | 13.4 | 3.8  | 8.6   | 4.9    | 3.8    | 16               | 110                   | 8 (50%)                    | 23.7                             | 56.5          | 19.8  |
| Cyprus         | 17.8                              | 2.2       | 8.9           | 8.9  | 17.8 | 4.4  | 11.1  | 4.4    | 2.2    | 1                | 45                    | 0 (0%)                     | 68.9                             | 26.7          | 4.4   |
| Czech Republic | 21.0                              | 0.7       | 0.7           | 8.1  | 12.2 | 2.5  | 9.2   | 1.8    | 4.6    | 2                | 217                   | 2 (100%)                   | 42.9                             | 47.7          | 9.4   |
| Denmark        | 23.3                              | 1.0       | 4.2           | 13.6 | 12.4 | 3.7  | 7.1   | 3.1    | 5.3    | 15               | 67                    | 6 (40%)                    | 28.5                             | 47.2          | 24.3  |
| Estonia        | 23.4                              | 0.6       | 6.3           | 6.9  | 19.8 | 2.9  | 5.8   | 6.3    | 2.9    | 4                | 182                   | 2 (50%)                    | 11.0                             | 50.1          | 38.9  |
| Finland        | 18.8                              | 1.1       | 5.4           | 12.7 | 16.2 | 6.7  | 9.5   | 5.2    | 6.0    | 12               | 89                    | 3 (25%)                    | 20.6                             | 49.7          | 29.7  |
| France         | 25.4                              | 1.4       | 4.7           | 10.7 | 8.3  | 4.0  | 6.8   | 3.7    | 3.4    | 23               | 99                    | 16 (70%)                   | 40.4                             | 42.7          | 16.8  |
| Germany        | 23.2                              | 1.4       | 10.5          | 11.3 | 14.5 | 6.6  | 7.6   | 6.5    | 4.6    | 37               | 143                   | 19 (51%)                   | 42.0                             | 42.9          | 15.1  |
| Greece         | 29.1                              | 0.6       | 3.1           | 7.8  | 16.0 | 2.8  | 9.4   | 2.6    | 3.4    | 29               | 62                    | 11 (38%)                   | 21.9                             | 55.7          | 22.5  |
| Hungary        | 23.2                              | 2.4       | 5.6           | 12.2 | 21.3 | 5.6  | 10.3  | 4.3    | 5.8    | 9                | 69                    | 3 (33%)                    | 20.1                             | 61.0          | 18.8  |
| Iceland        | 11.7                              | 0.0       | 6.2           | 11.1 | 17.3 | 1.9  | 6.2   | 1.2    | 6.8    | 4                | 41                    | 3 (75%)                    | 11.7                             | 56.8          | 31.5  |
| Ireland        | 24.5                              | 0.7       | 3.9           | 13.8 | 11.2 | 4.2  | 6.1   | 4.0    | 2.2    | 18               | 48                    | 15 (83%)                   | 20.4                             | 54.3          | 25.2  |
| Italy          | 20.5                              | 1.6       | 2.3           | 10.9 | 8.3  | 3.5  | 7.4   | 5.8    | 4.2    | 35               | 76                    | 15 (43%)                   | 28.7                             | 43.3          | 28.1  |
| Latvia         | 26.5                              | 0.7       | 4.0           | 7.6  | 27.8 | 4.3  | 4.0   | 3.3    | 4.0    | 3                | 101                   | 2 (67%)                    | 7.3                              | 51.3          | 41.4  |
| Lithuania      | 12.5                              | 0.5       | 7.7           | 4.3  | 32.0 | 2.4  | 4.5   | 4.0    | 6.4    | 3                | 125                   | 2 (67%)                    | 28.0                             | 62.1          | 9.9   |
| Netherlands    | 21.0                              | 0.8       | 6.2           | 9.2  | 11.2 | 5.4  | 4.7   | 7.2    | 4.9    | 18               | 90                    | 6 (33%)                    | 17.9                             | 44.2          | 37.9  |
| Norway         | 19.9                              | 0.3       | 5.2           | 8.4  | 13.8 | 4.4  | 4.6   | 4.8    | 4.1    | 10               | 69                    | 4 (40%)                    | 16.1                             | 47.8          | 36.1  |
| Poland         | 27.2                              | 0.5       | 3.3           | 11.8 | 30.2 | 6.5  | 5.8   | 3.0    | 3.5    | 6                | 66                    | 1 (17%)                    | 45.1                             | 42.1          | 12.8  |
| Portugal       | 19.7                              | 1.4       | 5.7           | 9.9  | 8.3  | 4.4  | 10.4  | 5.6    | 4.4    | 19               | 78                    | 9 (47%)                    | 27.9                             | 47.5          | 24.6  |
| Romania        | 24.4                              | 1.5       | 8.8           | 6.6  | 32.1 | 2.6  | 8.5   | 4.4    | 3.5    | 22               | 59                    | 11 (50%)                   | 20.9                             | 61.6          | 17.6  |
| Serbia         | 34.1                              | 0.0       | 3.5           | 4.8  | 16.5 | 3.5  | 10.6  | 2.4    | 2.4    | 2                | 43                    | 2 (100%)                   | 18.8                             | 37.6          | 43.5  |
| Slovakia       | 22.4                              | 1.0       | 1.9           | 8.0  | 27.2 | 5.4  | 8.5   | 5.8    | 4.2    | 10               | 116                   | 5 (50%)                    | 34.9                             | 50.0          | 15.1  |
| Slovenia       | 19.1                              | 0.6       | 5.2           | 6.8  | 10.2 | 3.5  | 6.4   | 2.9    | 3.7    | 5                | 104                   | 2 (40%)                    | 41.3                             | 45.4          | 13.3  |
| Spain          | 21.9                              | 1.5       | 3.1           | 11.3 | 7.7  | 4.7  | 10.1  | 4.2    | 4.5    | 61               | 89                    | 43 (70%)                   | 17.5                             | 49.7          | 32.8  |
| Sweden         | 16.5                              | 1.3       | 4.9           | 10.0 | 12.7 | 6.2  | 4.8   | 5.6    | 5.7    | 10               | 131                   | 7 (70%)                    | 30.1                             | 46.6          | 23.3  |
| Switzerland    | 21.1                              | 0.9       | 3.5           | 7.9  | 9.9  | 3.6  | 5.2   | 3.7    | 2.3    | 5                | 204                   | 2 (40%)                    | 23.1                             | 56.1          | 20.8  |
| United Kingdom | 18.1                              | 0.5       | 2.5           | 14.5 | 13.4 | 4.0  | 6.5   | 3.8    | 4.5    | 103              | 103                   | 52 (50%)                   | 20.1                             | 45.9          | 33.9  |

**Supplementary table 2. Sensitivity analysis for univariate logistic regression model utilising three random (disjoint) sub-samples of countries (models one to three) and a fourth model containing the whole set excluding the United Kingdom.** OR, odds ratio; ASA, American Society of Anesthesiologist's score; COPD, chronic obstructive pulmonary disease, IDDM, diabetes mellitus taking insulin; NIDDM, diabetes mellitus not taking insulin.

|                            | Random model 1<br>(n=22488) |         | Random model 2<br>(n=13899) |         | Random model 3<br>(n=10037) |         | Without UK (n=35873) |         | Simulation Results |         | Analysis of whole dataset<br>n= 46073 |         |
|----------------------------|-----------------------------|---------|-----------------------------|---------|-----------------------------|---------|----------------------|---------|--------------------|---------|---------------------------------------|---------|
|                            | Country n= 10               |         | Country n= 9                |         | Country n= 9                |         | OR                   | p-value | OR                 |         | OR                                    | p-value |
|                            | OR                          | p-value | OR                          | p-value | OR                          | p-value |                      |         | Lowest             | Highest |                                       |         |
| Age (per year)             | 1.02                        | <0.0001 | 1.01                        | <0.0001 | 1.02                        | <0.0001 | 1.01                 | <0.0001 | 1.01               | 1.02    | 1.01                                  | <0.0001 |
| Male sex                   | 1.10                        | 0.17    | 1.17                        | 0.05    | 1.26                        | 0.04    | 1.17                 | 0.003   | 1.10               | 1.26    | 1.15                                  | 0.003   |
| Smoker (yes/no)            | 0.84                        | 0.06    | 0.94                        | 0.52    | 0.96                        | 0.75    | 0.91                 | 0.13    | 0.75               | 0.91    | 0.90                                  | 0.07    |
| <b>ASA score</b>           |                             |         |                             |         |                             |         |                      |         |                    |         |                                       |         |
| 1                          | -                           | -       | -                           | -       | -                           | -       | -                    | -       | -                  | -       | -                                     | -       |
| 2                          | 0.96                        | 0.66    | 0.95                        | 0.61    | 0.91                        | 0.56    | 0.88                 | 0.08    | 0.88               | 0.96    | 0.94                                  | 0.36    |
| 3                          | 1.53                        | <0.0001 | 1.47                        | 0.001   | 1.62                        | 0.004   | 1.36                 | <0.0001 | 1.36               | 1.62    | 1.51                                  | <0.0001 |
| 4                          | 6.48                        | <0.0001 | 6.33                        | <0.0001 | 9.32                        | <0.0001 | 6.15                 | <0.0001 | 6.15               | 9.32    | 6.75                                  | <0.0001 |
| 5                          | 41.30                       | <0.0001 | 16.94                       | <0.0001 | 128.06                      | <0.0001 | 31.32                | <0.0001 | 16.94              | 128.06  | 35.61                                 | <0.0001 |
| <b>Grade of Surgery</b>    |                             |         |                             |         |                             |         |                      |         |                    |         |                                       |         |
| Minor                      | -                           | -       | -                           | -       | -                           | -       | -                    | -       | -                  | -       | -                                     | -       |
| Intermediate               | 0.78                        | 0.009   | 0.96                        | 0.66    | 1.30                        | 0.08    | 0.97                 | 0.68    | 0.78               | 1.30    | 0.93                                  | 0.22    |
| Major                      | 1.40                        | <0.0001 | 1.31                        | 0.012   | 3.07                        | <0.0001 | 1.63                 | <0.0001 | 1.31               | 3.07    | 1.59                                  | <0.0001 |
| <b>Urgency of surgery</b>  |                             |         |                             |         |                             |         |                      |         |                    |         |                                       |         |
| Elective                   | -                           | -       | -                           | -       | -                           | -       | -                    | -       | -                  | -       | -                                     | -       |
| Urgent                     | 1.64                        | <0.0001 | 1.51                        | <0.0001 | 2.56                        | <0.0001 | 1.81                 | <0.0001 | 1.51               | 2.56    | 1.71                                  | <0.0001 |
| Emergency                  | 3.47                        | <0.0001 | 2.42                        | <0.0001 | 4.35                        | <0.0001 | 3.36                 | <0.0001 | 2.42               | 4.35    | 3.20                                  | <0.0001 |
| <b>Surgical speciality</b> |                             |         |                             |         |                             |         |                      |         |                    |         |                                       |         |
| Orthopaedics               | 1.07                        | 0.65    | 0.88                        | 0.47    | 1.16                        | 0.50    | 0.89                 | 0.29    | 0.88               | 1.16    | 1.02                                  | 0.85    |
| Breast                     | 0.60                        | 0.08    | 0.86                        | 0.57    | 0.86                        | 0.75    | 0.87                 | 0.46    | 0.60               | 0.87    | 0.76                                  | 0.12    |
| Gynaecology                | 0.85                        | 0.38    | 0.89                        | 0.56    | 0.31                        | 0.004   | 0.81                 | 0.14    | 0.31               | 0.85    | 0.76                                  | 0.04    |
| Vascular                   | 1.72                        | 0.003   | 1.58                        | 0.03    | 1.31                        | 0.39    | 1.49                 | 0.004   | 1.31               | 1.72    | 1.61                                  | 0.0001  |
| Upper gastro-intestinal    | 1.79                        | 0.002   | 1.41                        | 0.10    | 3.35                        | <0.0001 | 1.91                 | <0.0001 | 1.41               | 3.35    | 1.88                                  | 0.0001  |
| Lower gastro-intestinal    | 1.32                        | 0.09    | 1.59                        | 0.008   | 2.22                        | 0.001   | 1.65                 | <0.0001 | 1.32               | 2.22    | 1.54                                  | 0.0001  |
| Hepato-biliary             | 1.23                        | 0.31    | 1.48                        | 0.06    | 1.35                        | 0.32    | 1.41                 | 0.01    | 1.23               | 1.48    | 1.35                                  | 0.025   |
| Plastic / cutaneous        | 0.93                        | 0.73    | 0.66                        | 0.10    | 0.73                        | 0.38    | 0.71                 | 0.04    | 0.66               | 0.93    | 0.79                                  | 0.12    |
| Urology                    | 0.72                        | 0.07    | 0.88                        | 0.52    | 0.80                        | 0.42    | 0.82                 | 0.15    | 0.72               | 0.88    | 0.78                                  | 0.042   |
| Kidney                     | 0.23                        | 0.04    | 0.33                        | 0.13    | 1.80                        | 0.24    | 0.59                 | 0.15    | 0.23               | 1.80    | 0.51                                  | 0.05    |
| Head and neck              | 0.66                        | 0.03    | 1.07                        | 0.71    | 0.61                        | 0.07    | 0.81                 | 0.10    | 0.61               | 1.07    | 0.82                                  | 0.09    |
| Other                      | -                           | -       | -                           | -       | -                           | -       | -                    | -       | -                  | -       | -                                     | -       |
| Laparoscopic surgery       | 0.64                        | <0.0001 | 0.86                        | 0.25    | 0.52                        | 0.004   | 0.75                 | 0.002   | 0.52               | 0.75    | 0.69                                  | <0.0001 |
| <b>Co-morbid disease</b>   |                             |         |                             |         |                             |         |                      |         |                    |         |                                       |         |
| Cirrhosis                  | 3.28                        | <0.0001 | 3.09                        | <0.0001 | 3.91                        | <0.0001 | 3.67                 | <0.0001 | 3.09               | 3.91    | 3.64                                  | <0.0001 |
| Heart failure              | 2.86                        | <0.0001 | 1.51                        | 0.014   | 2.16                        | <0.0001 | 1.90                 | <0.0001 | 1.51               | 2.86    | 2.10                                  | <0.0001 |
| COPD                       | 1.13                        | 0.24    | 1.35                        | 0.015   | 1.23                        | 0.23    | 1.15                 | 0.09    | 1.13               | 1.35    | 1.21                                  | 0.0008  |

|                         |      |         |      |         |      |         |      |         |      |      |      |         |
|-------------------------|------|---------|------|---------|------|---------|------|---------|------|------|------|---------|
| Coronary artery disease | 1.67 | <0.0001 | 1.64 | <0.0001 | 2.14 | <0.0001 | 1.71 | <0.0001 | 1.64 | 2.14 | 1.73 | <0.0001 |
| IDDM                    | 1.73 | <0.0001 | 1.80 | <0.0001 | 1.64 | 0.016   | 1.78 | <0.0001 | 1.64 | 1.80 | 1.73 | <0.0001 |
| NIDDM                   | 1.02 | 0.89    | 1.03 | 0.83    | 1.14 | 0.51    | 1.05 | 0.59    | 1.02 | 1.14 | 1.05 | 0.61    |
| Metastatic cancer       | 1.80 | <0.0001 | 1.96 | <0.0001 | 2.04 | <0.0001 | 1.98 | <0.0001 | 1.80 | 2.04 | 1.91 | <0.0001 |
| Stroke                  | 1.57 | 0.001   | 1.68 | 0.001   | 1.33 | 0.25    | 1.53 | <0.0001 | 1.33 | 1.68 | 1.57 | <0.0001 |

**Supplementary table 3. Binary logistic regression analysis (single level) (n=46073/46539) assessing pre- or intra-operative factors relating to hospital mortality.**

|                            | n           | Odds ratio | 95% confidence intervals | p-value |
|----------------------------|-------------|------------|--------------------------|---------|
| <b>Country</b>             |             |            |                          | <0.0001 |
| Belgium                    | 1478/1486   | 1.07       | 0.78 - 1.46              | 0.69    |
| Croatia                    | 1755/1767   | 2.77       | 2.23 - 3.44              | <0.0001 |
| Cyprus                     | 45/45       | 0.70       | 0.10 - 4.92              | 0.72    |
| Czech Republic             | 427/434     | 0.89       | 0.46 - 1.71              | 0.73    |
| Denmark                    | 994/1000    | 0.94       | 0.65 - 1.37              | 0.76    |
| Estonia                    | 726/727     | 0.45       | 0.25 - 0.80              | 0.007   |
| Finland                    | 1070/1071   | 0.40       | 0.26 - 0.61              | <0.0001 |
| France                     | 2264/2278   | 1.05       | 0.81 - 1.37              | 0.71    |
| Germany                    | 5243/5284   | 0.76       | 0.62 - 0.94              | 0.01    |
| Greece                     | 1795/1803   | 1.13       | 0.86 - 1.49              | 0.37    |
| Hungary                    | 619/621     | 1.09       | 0.70 - 1.70              | 0.69    |
| Iceland                    | 162/162     | 0.38       | 0.09 - 1.56              | 0.18    |
| Ireland                    | 854/856     | 2.02       | 1.48 - 2.75              | <0.0001 |
| Italy                      | 2622/2673   | 1.85       | 1.50 - 2.29              | <0.0001 |
| Latvia                     | 300/302     | 8.53       | 6.13 - 11.87             | <0.0001 |
| Lithuania                  | 373/375     | 1.07       | 0.58 - 1.97              | 0.84    |
| Netherlands                | 1566/1627   | 0.61       | 0.42 - 0.89              | 0.01    |
| Norway                     | 686/689     | 0.41       | 0.22 - 0.78              | 0.006   |
| Poland                     | 391/397     | 7.73       | 5.71 - 10.48             | <0.0001 |
| Portugal                   | 1477/1489   | 1.18       | 0.90 - 1.56              | 0.23    |
| Romania                    | 1290/1298   | 2.32       | 1.80 - 2.99              | <0.0001 |
| Serbia                     | 85/85       | 0.89       | 0.21 - 3.74              | 0.88    |
| Slovakia                   | 1150/1156   | 4.52       | 3.58 - 5.69              | <0.0001 |
| Slovenia                   | 514/518     | 1.01       | 0.60 - 1.71              | 0.97    |
| Spain                      | 5412/5433   | 1.17       | 0.98 - 1.40              | 0.09    |
| Sweden                     | 1304/1314   | 0.49       | 0.32 - 0.75              | 0.001   |
| Switzerland                | 1019/1019   | 0.66       | 0.42 - 1.04              | 0.07    |
| United Kingdom (reference) | 10452/10630 | 1.00       | -                        | -       |
| <b>Urgency of surgery</b>  |             |            |                          | <0.0001 |
| Elective (reference)       | 34734/35049 | 1.00       | -                        | -       |
| Urgent                     | 8810/8923   | 1.44       | 1.28 - 1.63              | <0.0001 |
| Emergency                  | 2529/2557   | 2.23       | 1.89 - 2.64              | <0.0001 |
| <b>Grade of surgery</b>    |             |            |                          | <0.0001 |
| Minor (reference)          | 11932/12041 | 1.00       | -                        | -       |
| Intermediate               | 22070/22231 | 0.83       | 0.73 - 0.94              | 0.004   |
| Major                      | 12071/12170 | 1.15       | 0.99 - 1.32              | 0.06    |
| <b>Surgical specialty</b>  |             |            |                          | <0.0001 |
| Orthopaedics               | 12123/12214 | 1.08       | 0.87 - 1.33              | 0.50    |
| Breast                     | 1496/1500   | 0.91       | 0.63 - 1.30              | 0.59    |
| Gynaecology                | 3952/3972   | 0.96       | 0.73 - 1.26              | 0.76    |
| Vascular                   | 2354/2376   | 1.10       | 0.84 - 1.43              | 0.49    |

|                         |             |       |              |         |
|-------------------------|-------------|-------|--------------|---------|
| Upper gastro-intestinal | 2214/2228   | 1.57  | 1.21 - 2.04  | 0.001   |
| Lower gastro-intestinal | 4937/4972   | 1.24  | 0.99 - 1.56  | 0.07    |
| Hepato-biliary          | 2237/2247   | 1.14  | 0.86 - 1.51  | 0.36    |
| Plastic / cutaneous     | 2404/2247   | 0.91  | 0.67 - 1.23  | 0.53    |
| Urology                 | 4846/4881   | 0.85  | 0.66 - 1.11  | 0.23    |
| Kidney                  | 456/463     | 0.47  | 0.24 - 0.95  | 0.035   |
| Head and neck           | 5614/5640   | 1.04  | 0.82 - 1.33  | 0.74    |
| Other (Reference)       | 3440/3463   | 1.00  | -            | -       |
| Age (per year)          | 46073/46539 | 1.01  | 1.01 - 1.01  | <0.0001 |
| <b>ASA</b>              |             |       |              | <0.0001 |
| 1 (reference)           | 11540/11642 | 1.00  | -            | -       |
| 2                       | 21418/21582 | 0.77  | 0.66 - 0.89  | 0.001   |
| 3                       | 11482/11574 | 1.06  | 0.89 - 1.25  | 0.54    |
| 4                       | 1545/1559   | 3.85  | 3.13 - 4.75  | <0.0001 |
| 5                       | 88/90       | 13.51 | 8.07 - 22.60 | <0.0001 |
| Metastatic cancer       | 46073/46539 | 1.36  | 1.12 - 1.64  | 0.002   |
| Cirrhosis               | 46073/46539 | 2.01  | 1.49 - 2.72  | <0.0001 |
| Intercept               |             | 0.02  | 0.01 - 0.00  | <0.0001 |

**Supplementary table 4. Hierarchical binary logistic regression model (n= 46073/46539) assessing pre- or intra-operative factors relating to in-hospital mortality using a two level model (patient / hospital) with hospital as a random factor. ASA, American Society of Anesthesiologist's score.**

| Variable                   | n           | Odds ratio | 95% confidence intervals | p-value |
|----------------------------|-------------|------------|--------------------------|---------|
| <b>Country</b>             |             |            |                          | <0.0001 |
| Belgium                    | 1478/1486   | 1.65       | 0.81 – 3.40              | 0.17    |
| Croatia                    | 1755/1767   | 1.89       | 0.94 – 3.80              | 0.07    |
| Cyprus                     | 45/45       | 0.82       | 0.04 – 16.70             | 0.90    |
| Czech Republic             | 427/434     | 1.30       | 0.23 – 7.46              | 0.77    |
| Denmark                    | 994/1000    | 1.16       | 0.52 – 2.61              | 0.72    |
| Estonia                    | 726/727     | 0.60       | 0.16 – 2.28              | 0.45    |
| Finland                    | 1070/1071   | 0.44       | 0.19 – 1.05              | 0.06    |
| France                     | 2264/2278   | 1.36       | 0.73 – 2.56              | 0.34    |
| Germany                    | 5243/5284   | 0.85       | 0.50 – 1.43              | 0.54    |
| Greece                     | 1795/1803   | 1.20       | 0.67 – 2.16              | 0.55    |
| Hungary                    | 619/621     | 1.23       | 0.43 – 3.50              | 0.69    |
| Iceland                    | 162/162     | 0.47       | 0.07 – 3.41              | 0.46    |
| Ireland                    | 854/856     | 2.61       | 1.30 – 5.27              | 0.007   |
| Italy                      | 2622/2673   | 1.70       | 0.98 – 2.97              | 0.06    |
| Latvia                     | 300/302     | 4.98       | 1.22 – 20.29             | 0.025   |
| Lithuania                  | 373/375     | 1.21       | 0.21 – 6.95              | 0.83    |
| Netherlands                | 1566/1627   | 0.63       | 0.28 – 1.41              | 0.26    |
| Norway                     | 686/689     | 0.51       | 0.17 – 1.49              | 0.22    |
| Poland                     | 391/397     | 6.92       | 2.37 – 20.27             | <0.0001 |
| Portugal                   | 1477/1489   | 1.43       | 0.72 – 2.83              | 0.30    |
| Romania                    | 1290/1298   | 3.19       | 1.61 – 6.29              | <0.0001 |
| Serbia                     | 85/85       | 1.06       | 0.11 – 10.05             | 0.96    |
| Slovakia                   | 1150/1156   | 2.15       | 0.91 – 5.07              | 0.08    |
| Slovenia                   | 514/518     | 1.12       | 0.30 – 4.22              | 0.86    |
| Spain                      | 5412/5433   | 1.39       | 0.89 – 2.18              | 0.15    |
| Sweden                     | 1304/1314   | 0.58       | 0.23 – 1.49              | 0.26    |
| Switzerland                | 1019/1019   | 0.86       | 0.25 – 2.97              | 0.81    |
| United Kingdom (reference) | 10452/10630 | 1.00       | -                        | -       |
| <b>Urgency of surgery</b>  |             |            |                          | <0.001  |
| Elective (reference)       | 34734/35049 | 1.00       | -                        | -       |
| Urgent                     | 8810/8923   | 1.78       | 1.56 – 2.04              | <0.0001 |
| Emergency                  | 2529/2557   | 3.23       | 2.66 – 2.64              | <0.0001 |
| <b>Grade of surgery</b>    |             |            |                          | <0.0001 |
| Minor (reference)          | 11932/12041 | 1.00       | -                        | -       |
| Intermediate               | 22070/22231 | 0.79       | 0.68 – 0.91              | 0.001   |
| Major                      | 12071/12170 | 1.12       | 0.96 – 1.32              | 0.16    |
| <b>Surgical specialty</b>  |             |            |                          | <0.0001 |
| Orthopaedics               | 12123/12214 | 0.79       | 0.62 – 1.01              | 0.06    |
| Breast                     | 1496/1500   | 1.08       | 0.72 – 1.60              | 0.72    |
| Gynaecology                | 3952/3972   | 0.92       | 0.68 – 1.25              | 0.60    |
| Vascular                   | 2354/2376   | 0.95       | 0.72 – 1.27              | 0.75    |
| Upper gastro-intestinal    | 2214/2228   | 1.57       | 1.18 – 2.07              | 0.002   |



|                         |             |       |              |         |
|-------------------------|-------------|-------|--------------|---------|
| Lower gastro-intestinal | 4937/4972   | 1.13  | 0.88 – 1.45  | 0.36    |
| Hepato-biliary          | 2237/2247   | 1.10  | 0.81 – 1.49  | 0.53    |
| Plastic / cutaneous     | 2404/2247   | 0.83  | 0.59 – 1.15  | 0.26    |
| Urology                 | 4846/4881   | 0.74  | 0.56 – 0.98  | 0.03    |
| Kidney                  | 456/463     | 0.38  | 0.18 – 0.82  | 0.01    |
| Head and neck           | 5614/5640   | 1.15  | 0.88 – 1.49  | 0.32    |
| Other (Reference)       | 3440/3463   | 1.00  | -            | -       |
| Age (per year)          | 46073/46539 | 1.00  | 1.00 - 1.01  | <0.0001 |
| <b>ASA</b>              |             |       |              | <0.0001 |
| 1 (reference)           | 11540/11642 | 1.00  | -            | -       |
| 2                       | 21418/21582 | 0.76  | 0.64 – 0.90  | 0.002   |
| 3                       | 11482/11574 | 1.20  | 0.98 – 1.46  | 0.07    |
| 4                       | 1545/1559   | 4.75  | 3.74 – 6.04  | <0.0001 |
| 5                       | 88/90       | 18.03 | 10.73– 30.31 | <0.0001 |
| Metastatic cancer       | 46073/46539 | 1.39  | 1.14 – 1.71  | 0.002   |
| Cirrhosis               | 46073/46539 | 2.13  | 1.54 – 2.95  | <0.0001 |
| Intercept               | -           | 0.01  | 0.01 – 0.01  | <0.0001 |

**Supplementary table 5. Sensitivity analysis for two level model utilising three random (disjoint) sub-samples of countries (models one to three) of the dataset and a fourth model containing the whole set excluding the United Kingdom. OR, odds ratios; ASA, American Society of Anesthesiologist's score.**

|                           | Random model 1<br>(n=22337) |         | Random model 2<br>(n=13751) |         | Random model 3<br>(n=9985) |         | Without UK |         | Simulation Results |         | Analysis of whole dataset |         |
|---------------------------|-----------------------------|---------|-----------------------------|---------|----------------------------|---------|------------|---------|--------------------|---------|---------------------------|---------|
|                           | Countries = 10              |         | Countries = 9               |         | Countries = 9              |         | n= 35261   |         | OR                 |         | n= 46073                  |         |
|                           | OR                          | p-value | OR                          | p-value | OR                         | p-value | OR         | p-value | Lowest             | Highest | OR                        | p-value |
| Age (per year)            | 1.01                        | <0.0001 | 1.01                        | 0.003   | 1.01                       | 0.046   | 1.01       | <0.0001 | 1.01               | 1.01    | 1.00                      | 0.0001  |
| <b>Co-morbid disease</b>  |                             |         |                             |         |                            |         |            |         |                    |         |                           |         |
| Metastatic disease        | 1.20                        | 0.25    | 1.56                        | 0.01    | 1.52                       | 0.06    | 1.55       | 0.0001  | 1.20               | 1.56    | 1.39                      | 0.002   |
| Cirrhosis                 | 1.35                        | 0.31    | 2.41                        | 0.001   | 3.44                       | <0.0001 | 2.20       | <0.0001 | 1.35               | 3.44    | 2.13                      | <0.0001 |
| <b>Urgency of surgery</b> |                             |         |                             |         |                            |         |            |         |                    |         |                           |         |
| Elective (reference)      | 1.00                        | -       | 1.00                        | -       | 1.00                       | -       | 1.00       | -       | -                  | -       | -                         | -       |
| Urgent                    | 1.80                        | <0.0001 | 1.70                        | <0.0001 | 1.90                       | <0.0001 | 1.77       | <0.0001 | 1.70               | 1.90    | 1.78                      | <0.0001 |
| Emergency                 | 3.27                        | <0.0001 | 2.36                        | <0.0001 | 3.01                       | <0.0001 | 3.25       | <0.0001 | 2.36               | 3.27    | 3.23                      | <0.0001 |
| <b>Grade of surgery</b>   |                             |         |                             |         |                            |         |            |         |                    |         |                           |         |
| Minor (reference)         | 1.00                        | -       | 1.00                        | -       | 1.00                       | -       | 1.00       | -       | -                  | -       | -                         | -       |
| Intermediate              | 0.72                        | 0.002   | 0.81                        | 0.08    | 0.94                       | 0.73    | 0.81       | 0.008   | 0.72               | 0.94    | 0.79                      | 0.001   |
| Major                     | 1.00                        | 0.97    | 1.25                        | 0.13    | 1.23                       | 0.29    | 1.17       | 0.10    | 1.00               | 1.25    | 1.12                      | 0.16    |
| <b>ASA score</b>          |                             |         |                             |         |                            |         |            |         |                    |         |                           |         |
| 1 (reference)             | 1.00                        | -       | 1.00                        | -       | 1.00                       | -       | 1.00       | -       | -                  | -       | -                         | -       |
| 2                         | 0.75                        | 0.02    | 0.81                        | 0.17    | 0.78                       | 0.22    | 0.73       | 0.001   | 0.73               | 0.81    | 0.76                      | 0.002   |
| 3                         | 1.23                        | 0.15    | 1.25                        | 0.21    | 1.18                       | 0.48    | 1.09       | 0.45    | 1.09               | 1.25    | 1.20                      | 0.07    |
| 4                         | 4.47                        | <0.0001 | 6.19                        | <0.0001 | 4.66                       | <0.0001 | 4.45       | <0.0001 | 4.45               | 6.19    | 4.75                      | <0.0001 |
| 5                         | 24.05                       | <0.0001 | 7.75                        | <0.0001 | 54.16                      | <0.0001 | 16.05      | <0.0001 | 7.75               | 54.16   | 18.03                     | <0.0001 |
| <b>Surgical procedure</b> |                             |         |                             |         |                            |         |            |         |                    |         |                           |         |
| Orthopaedics              | 0.78                        | 0.95    | 0.80                        | 0.32    | 0.77                       | 0.34    | 0.77       | 0.05    | 0.77               | 0.80    | 0.79                      | 0.06    |
| Breast                    | 0.98                        | 0.15    | 1.23                        | 0.53    | 0.87                       | 0.80    | 1.26       | 0.29    | 0.87               | 1.26    | 1.08                      | 0.72    |
| Gynaecology               | 1.18                        | 0.58    | 0.77                        | 0.33    | 0.48                       | 0.08    | 0.94       | 0.71    | 0.48               | 1.18    | 0.92                      | 0.60    |
| Vascular                  | 0.91                        | 0.81    | 0.91                        | 0.74    | 1.01                       | 0.98    | 0.94       | 0.73    | 0.91               | 1.01    | 0.95                      | 0.75    |
| Upper gastro-intestinal   | 1.58                        | 0.06    | 1.06                        | 0.82    | 2.54                       | 0.002   | 1.60       | 0.003   | 1.06               | 2.54    | 1.57                      | 0.002   |
| Lower gastro-intestinal   | 1.03                        | 0.12    | 1.01                        | 0.96    | 1.52                       | 0.13    | 1.18       | 0.25    | 1.01               | 1.52    | 1.13                      | 0.36    |
| Hepato-biliary            | 1.13                        | 0.12    | 1.15                        | 0.59    | 0.90                       | 0.76    | 1.14       | 0.42    | 0.90               | 1.15    | 1.10                      | 0.53    |
| Plastic / cutaneous       | 0.90                        | 0.50    | 0.65                        | 0.17    | 0.86                       | 0.68    | 0.78       | 0.20    | 0.78               | 0.90    | 0.83                      | 0.26    |
| Urology                   | 0.82                        | 0.90    | 0.67                        | 0.11    | 0.64                       | 0.16    | 0.77       | 0.09    | 0.64               | 0.82    | 0.74                      | 0.04    |
| Kidney                    | 0.17                        | 0.09    | 0.11                        | 0.02    | 1.95                       | 0.22    | 0.46       | 0.07    | 0.11               | 1.95    | 0.38                      | 0.014   |
| Head and neck             | 0.90                        | 0.64    | 1.54                        | 0.50    | 0.93                       | 0.81    | 1.22       | 0.18    | 0.90               | 1.54    | 1.14                      | 0.32    |
| Other (reference)         | 1.00                        | -       | 1.00                        | -       | 1.00                       | -       | 1.00       | -       | -                  | -       | -                         | -       |

Supplementary table 6. Country estimates from two level model (hospital and patient) assessing in hospital death as the dependent variable together with the following independent variables: age, surgical procedure category, American Society of Anesthesiologist's (ASA) score, urgency and grading of surgery, presence of metastatic disease or cirrhosis. In addition the following interaction factors were included in the model: ASA\*urgency ( $p<0.0001$ ), Age\*urgency ( $p=0.017$ ), Age\*grade of surgery ( $p=0.007$ ) and country\*age ( $p<0.0001$ ).

|                | Odds Ratio | 95% confidence intervals | p-value |
|----------------|------------|--------------------------|---------|
| Belgium        | 1.65       | 0.80 – 3.40              | 0.17    |
| Croatia        | 1.87       | 0.93 – 3.77              | 0.08    |
| Cyprus         | 0.82       | 0.04 – 16.65             | 0.90    |
| Czech Republic | 1.25       | 0.22 – 7.17              | 0.80    |
| Denmark        | 1.14       | 0.51 – 2.57              | 0.75    |
| Estonia        | 0.57       | 0.15 – 2.18              | 0.41    |
| Finland        | 0.42       | 0.18 – 1.01              | 0.05    |
| France         | 1.38       | 0.73 – 2.60              | 0.32    |
| Germany        | 0.82       | 0.49 – 1.39              | 0.46    |
| Greece         | 1.18       | 0.65 – 2.12              | 0.59    |
| Hungary        | 1.16       | 0.41 – 3.29              | 0.79    |
| Iceland        | 0.52       | 0.07 – 3.70              | 0.51    |
| Ireland        | 2.97       | 1.47 – 5.99              | 0.002   |
| Italy          | 1.70       | 0.98 – 2.97              | 0.06    |
| Latvia         | 5.21       | 1.28 – 21.25             | 0.02    |
| Lithuania      | 1.14       | 0.20 – 6.56              | 0.88    |
| Netherlands    | 0.62       | 0.27 – 1.39              | 0.24    |
| Norway         | 0.48       | 0.16 – 1.42              | 0.19    |
| Poland         | 6.66       | 2.28 – 19.49             | 0.001   |
| Portugal       | 1.42       | 0.72 – 2.81              | 0.31    |
| Romania        | 3.11       | 1.57 – 6.16              | 0.001   |
| Serbia         | 0.98       | 0.10 – 9.23              | 0.99    |
| Slovakia       | 2.07       | 0.88 – 4.87              | 0.10    |
| Slovenia       | 1.12       | 0.30 – 4.18              | 0.86    |
| Spain          | 1.41       | 0.90 – 2.21              | 0.13    |
| Sweden         | 0.56       | 0.22 – 1.44              | 0.23    |
| Switzerland    | 0.87       | 0.25 – 2.99              | 0.82    |
| United Kingdom | 1.00       | -                        | -       |

## **Appendix: Members of the EuSOS Study group**

1,923 investigators participated in the EuSOS study

### **EuSOS Steering Committee**

Peter Bauer, Medical University of Vienna, Austria

Andreas Hoeft, Universitätsklinikum Bonn, Germany

Philipp Metnitz, Medical University of Vienna, Austria

Rui Moreno, Hosp St. António dos Capuchos, Centro Hospitalar de Lisboa Central, Portugal

Rupert Pearse, Queen Marys University of London, United Kingdom (Chief investigator)

Paolo Pelosi, IRCCS AOU San Martino- IST, University of Genoa, Italy

Andrew Rhodes, St Georges University of London, United Kingdom

Claudia Spies, Charité-Universitaetsmedizin, Berlin, Germany

Benoit Vallet, University Hospital, Lille Nord de France

Jean-Louis Vincent, Erasme Hospital, Université Libre de Bruxelles, Belgium

### **EuSOS Management Team**

Sandrine Damster, European Society of Anaesthesiology, Belgium

Kim Golder, Southampton University Hospitals NHS Trust, United Kingdom

Russell Hewson, Barts Health NHS Trust, London, United Kingdom

Marta Januszewska, Queen Marys University of London, United Kingdom

Brigitte Leva, European Society of Anaesthesiology, Belgium

Rui Moreno, Hosp St. António dos Capuchos, Centro Hospitalar de Lisboa Central, Portugal

Rupert Pearse, Queen Marys University of London, United Kingdom (Chief investigator)

Vasco Ramos, Hosp St. António dos Capuchos, Centro Hospitalar de Lisboa Central, Portugal

Andrew Rhodes, St Georges University of London, United Kingdom

## National study groups

\* signifies Local lead Investigator

### Belgium

National Co-ordinator

Eric Hoste, Ghent University Hospital

University Hospital Brussels:

Luc Huyghens, Rita Jacobs, Veerle Van Mossevelde, Godelieve Opdenacker, Jan Poelaert\*, Herbert Spapen\*

AZ Sint Lucas Gent :

Kris Leleu\*, Dirk Rijckaert

OLV Hospital Aalst:

Koen De Decker, Luc Foubert\*, Nikolaas De Neve

CHU Charleroi:

Patrick Biston\*, Michael Piagnerelli

Cliniques de l'Europe (St-Michel):

Vincent Collin\*

Ghent University Hospital:

Nadia den Blauwen\*, Charlotte Clauwaert, Luc De Crop, Eric Hoste\*, An Verbeke

Heilige Hartziekenhuis Roeselare:

Pieter Derumeaux, Christophe Gardin, Sebastiaan Kindt, Sofie Louage, Bruno Verhamme\*

Sint-Vincentius Antwerpen:

Patrick Druwé, Ingrid Lahaye, Francis Rosseel, Robert Rutsaert\*, Luc Vanlinthout

Cliniques Universitaires Saint-Luc ASBL:

Marc De Kock\*, Patrice Forget, Pascal Georges, Irina Grosu, David Kahn, Fernande Lois, Mona Momeni, Audrey Pospiech, Bernadette Yemnga

ZNA Stuivenberg:

Jean-Luc Jadoul\*, Manu Malbrain

Cliniques Universitaires UCL de Mont-Godinne:

Dana Bosinceanu, Edith Collard\*

Antwerp University Hospital:

Philippe Jorens, Dirk Reyntiens, Carine Smitz, Marcel Vercauteren\*

Erasme Hospital, Université Libre de Bruxelles:

David Fagnoul\*, Luc van Obbergh, Jean-Louis Vincent

## Croatia

### National Co-ordinators

Tatjana Goranović, Branka Mazul-Sunko, University Hospital Sveti Duh Zagreb

### Akromion Special Hospital for Orthopaedic Surgery:

Krapinske Toplice, Krešimir Oremuš\*

### University Hospital Dubrava Zagreb:

Gabrijela Bešlić, Viktor Duzel\*, Ada Hauptman, Sanja Peremin, Andrej Šribar, Miroslav Župčić

### General Hospital Dr Josip Benčević:

Slavonski Brod, Ivan Mirković\*

### General Hospital Karlovac:

Zlata Šarić Bauer, Matija Belavić, Božidar Blažanin, Mirjana Lončarić Katušin, Antonija Brozović Krijan, Petar Mišković, Nataša Šimić-Korać, Jasna Topić, Antonio Žilić\*, Josip Žuni

### University Hospital Merkur Zagreb:

Ivana Acan, Mirta Adanić, Nikola Ivanov, Jadranka Pavičić Šarić\*, Katarina Tomulić, Nataša Visković

### University Hospital Center Osijek:

Silvana Bošnjak, Ivana Haršanji Drenjančević\*, Gordana Kristek, Slavica Kvolik, Stela Markić, Andreja Stojanovic Rakipovic, Ozana Katarina Tot, Darija Venzera- Azenic

### General Hospital Pula: Lada Kalagac Fabris\*

### University Clinical Center Rebro Zagreb:

Iva Bačak-Kocman\*, Igor Balenović, Daniela Bandić, Patricia Adrienne Judith Deutsch, Loredana Divjak, Ina Grčić Filipović, Zvonka Gužvinac, Zrinka Krznarić, Yvonne Lončarić, Jelena Vadlja Magaš, Marek Mitrović, Marija Okić, Mario Pavlek, Elza Ramov, Karolina Rezek, Ante Sekulić, Boris Tomasevic, Mirjana Mirić, Anita Tomašević, Tina Tomić Mahečić, Vilena Vrbanić

### Clinical Hospital Centre Rijeka:

Mirna Bobinac, Alfred Božić\*, Danijela Debelic, Vedran Frkovic

University Hospital Center Sestre Milosrdnice:

Inga Mladić Batinica, Senka Baranović, Željka Gavranović\*, Mirna Kikec, Branka Maldini, Stela Marić

University Hospital Split:

Ivan Agnić, Nikola Delić, Nataša Dropulić, Toni Kljaković Gašpić, Darko Ilić, Božena Ivančev, Nenad Karanović\*, Dorjan Kušević, Zlatko Marović, Matija Milić, Ana Neveščanin, Tatjana Petković, Mario Smoje

University Hospital Sveti Duh Zagreb:

Gordana Brozović, Tatjana Goranović, Milana Jelisavac, Martina Matolić, Branka Mazul-Sunko\*, Dagmar Oberhofer, Ana Marija Pavičić, Kata Šakić

General Hospital Varaždin:

Margarita Delija Bozovic, Zvezdana Kotorac Krecek, Renata Krobot\*

General Hospital Zadar:

Tatjana Andabaka, Mislav Bratanić, Orjana Dzepina, Martina Kraljev, Julija Šeric, Tatjana Šimurina\*

General Hospital OB Hrvatski Ponos, Knin:

Rosa Grujić, Biljana Nacevski-Bulaja\*

General Hospital Šibenik:

Mirna Barižon, Vrančić Danira, Bulaja Dražen, Kimer Dušanka, Marijana Bašić Halužan, Žaja Joško, Roca Katica, Magda Labor, Tea Grgurević Marinković, Danči Mihovilčević, Bego Marija, Marinković Srečko, Srđan Vranković\*



## **Cyprus**

National Co-ordinator

Theodoros Kyprianou, Nicosia General Hospital

Nicosia General Hospital:

Theodoros Kyprianou\*, Kyriakos Neophytou

## **Czech Republic**

National Co-ordinators

Vladimir Cerny, University Hospital Hradec Kralove

Karel Cvachovec, Motol University Hospital

Faculty Hospital Brno:

Barbora Belikova, Michal Drab, Kamil Hudacek, Ivo Krikava, Petr Stourac\*, Katarina Zadrazilova

Motol University Hospital:

Vladimír Bicek, Milena Brabcová, Radka Klozová, Jaromír Vajter, Tomáš Vymazal\*

## Denmark

National Co-ordinator

Palle Toft, Odense University Hospital

Esbjerg Intensiv 241:

Louise Blichfeldt\*, Bo Dilling Hansen

Bispebjerg Hospital:

Kirsten Moller, Jeppe Sylvest Nielsen\*

Aarhus Universitets Hospital:

Joachim Frederiksen\*

Hospital Soenderjylland:

Johnny Dohn Andersen\*, Jan Peter Kühne, Siv Leivdal

Glostrup Hospital:

Line Stendell\*

Sygehus Vendsyssel:

Martin Simonsen, Marcin Konrad Zoltowski\*

Aalborg Hospital:

Zahida Salman Ali, Morten Freundlich\*, Jurgita Pilypaite

Odense University Hospital:

Nicola Groes Clausen, Palle Toft\*

Randers Regionshospital:

Line Thorup\*

Kolding Sygehus:

Frank Hansen\*

Hillerød Hospital:

Morten Bestle, Christian Steen Hansen\*

Rigshospitalet:

Arash Afshari\*, Anders Bastholm Bille, Michele Lefort, Erik L. Secher

Regionshospitalet Viborg:

Lisbeth Liboriussen\*

## **Estonia**

National Co-ordinator

Veiko Herodes, North Estonian Medical Centre

North Estonian Medical Centre:

Eve Härma\*, Kadri Marvet, Kristiina Pool

Tartu University Hospital:

Pille Kallas, Triinu-Kreete Mägi, Jaan Sütt\*, Kerli Vijar, Evelin Visk, Mare Vinnal

East Tallinn Central Hospital:

Jaanus Ellermaa, Liia Liibusk, Artur Tikkerberi\*

West Tallinn Central Hospital:

Ilme Falk, Esta Mällo, Jaak Talving\*

## Finland

National Co-ordinator

Ville Pettilä, Helsinki University Hospital

South Karelia Central Hospital Lappeenranta:

Seppo Hovilehto\*, Anne Kirsi, Seppo Mustola, Pekka Tiainen, Juhani Toivonen

Keski-Pohjanmaa Central Hospital:

Sandra Dabnell, Tadeusz Kaminski\*, Anu Sysimetsa

Helsinki University Central Hospital:

Maija Kaukonen\*, Päivi Silvasti, Kaisa Vainio

Satakunta District Hospital:

Vesa Lund, Sari Sjövall\*

Seinäjäki Central Hospital:

Kari Saarinen\*, Matti Viitanen

Kanta-Häme Central Hospital Hämeenlinna:

Tommi Ahonen, Ari Alaspää\*, Ritva Zitting

Central Finland Central Hospital, Jyväskylä :

Aarne Saarinen, Annette Moisander, Bodo Wagner, Raili Laru-Sompa\*, Esa Elomaa, Leena Lavonen, Juha Nevantaus, Klaus Geier, Tomi Kavasmaa, Ursula Koorits, Mare Kubjas, Seppo Lauritsalo, Lauri Ottelin, Markki Palve, Jari Pynnönen, Inga Rääbis, Minna Saarelainen, Tapani Heikkilä, Timo Kontula, Markku Lehtimäki, Jari Liimatainen, Mari Moilanen-Oikarinen, Marika Pakarinen, Riku Palanne, Hanna Seppänen, Anni Pulkkinen, Heikki Vääräniemi,

Kainuu Central Hospital, Kajaani, Sami Paananen\*

Oulu University Hospital:

Juha Koskenkari\*, Sinikka Sälkiö, Merja Vakkala

Päijät-Häme Central Hospital:

Talvikki Koskue, Pekka Loisa\*

Turku University Hospital:

Ruut Laitio\*

Vaasa Central Hospital:

Raku Hautamäki, Simo-Pekka Koivisto\*

## France

National Co-ordinators

Emmanuel Futier, University Hospital of Clermont-Ferrand

Jean-Yves Lefrant, University Hospital of Nimes

Centre Hospitalier Universitaire De Reims:

Alain Leon\*

Hôpital Tenon Ap-Hp Paris:

Francis Bonnet, Emmanuel Marret\*, Catherine Spielvogel, Chryssa Papageorgiou, Olga Szymkiewicz, Felix Tounou-Akue

Hôpital De La Croix-Rousse CHU Lyon:

Frederic Aubrun\*, Aurélie Bonnet, Mathieu Gazon, Michel Guiraud, Virginie Laurent

CHU Antoine Béclère Clamart:

Guillaume Tachon\*, Nadège Demars, Anne-Sylvie Dumenil, Frederic Mercier

Centre Hospitalier Argenteuil:

Alain Landais\*, Herve Mentec

University Hospital of Clermont-Ferrand Estaing Hospital: Marie Bazin, Emmanuel Futier\*, Sophie Gonnu, Antoine Petit

CHU Michallon Grenoble:

Pierre Albaladejo, Luc Almeras, Amélie Bataillard, Marine Rossi-Blancher\*

Groupe Hospitalo Universitaire Carémeau CHU Nimes:

Jean Yves Lefrant\*

Hôpitaux Universitaires de Strasbourg, Nouvel Hôpital Civil:

Florian Barthel, Dan Hallel, Hicham Sbai, Pamela Khalifeh, Lionel Lidzborski, Marion Jully, Ecaterina Platon, Julien Pottecher\*, Romain Baumgarten, Christel Schultz, Fayçal ElMiloudi, Julie Lefebvre, Karen Waton, Adrien Sprunck, Annick Steib, Adrien Thibaud, Vincent Thuet, Vianney Kieffer



Hôpital Saint-Louis Ap-Hp:

Delphine Dubois-Vallaud, Laurent Jacob\*

Hotel Dieu Aphp Paris:

Xavier Becanne\*, Salim Cherfaoui, Remy Gauzit, Anne Godier, Mourad Lakhdari, Charles Samma

Clinique Du Millenaire, Montpellier:

Jean-Yves Bigeon, Philippe Burtin\*, Constantin Halchini, Magali Lacroix, Frederic Pinna

Manchester Hospital Charleville-Mézières:

Aurélie Barbes, Bernard Just, Philippe Mateu\*

Hôpital Saint-Jean Perpignan:

Laurent Benayoun, Philippe Berger\*

Hôpital Gui De Chauviac CHU de Montpellier:

Nathalie Granier, Pierre Francois Perrigault\*

Hôpital D'instruction Des Armées Du Val-De-Grace:

Nicolas Libert, Stephan De Rudnicki\*, Stéphane Merat

Hôpital Rangueil CHU Toulouse:

Benoit Bourdet, Fabrice Ferré, Vincent Minville\*

University Hospital of Lyon CHU Lyon Sud:

Vincent Piriou, Philippe Rague, Florent Wallet\*

University Hospital of Lille, Huriez Hospital:

Gilles Lebuffe\*

University Hospital of Lille - Calmette Hospital:

Jacques Desbordes\*, Emmanuel Robin

Nice University Hospital:

Carole Ichai, Jean-Christophe Orban\*

## Germany

National Co-ordinators

Gernot Marx, Universitätsklinikum der RWTH Aachen

Michael Sander, Charite Universitätsmedizin Berlin

University Hospital Bochum Knappschafts Krankenhaus:

André Gottschalk\*, André Piontek, Matthias Unterberg

Charité-Universitätsmedizin Berlin Campus Benjamin Franklin:

Justus Hilpert, Martin Kees, Andreas Triltsch\*, Carola Wiegand-Löhnert

Krankenhaus Düren:

Christiane Glöckner, Andreas Hohn\*, Elmar Rose, Stefan Schröder, Oliver Wiese

University Hospital Bonn:

Eli Awlakpui, Andreas Hoeft, Mona Scheidemann, Maria Wittmann\*

Evangelische Elisabeth Klinik Berlin:

Axel Ramminger\*

University Hospital Carl Gustav:

Carus Dresden, Marcelo Gama de Abreu, Axel Heller\*, Christine Marx, Julia Neidel

Charité-Universitätsmedizin Berlin, Campus Virchow Klinikum:

Anton Goldmann, Christian von Heymann\*, Beatrix Laetsch, Esther Maahs, Lars Scholz

Altmark-Klinikum GmbH Krankenhaus Salzwedel:

Dirk Frenzel\*, Kyros Massarat

Schön Klinik München Harlaching:

Franz-Peter Lenhart, Florian Reichle\*, Kristina Rudlof

St. Joseph Krankenhaus Berlin Tempelhof:

Friedrich Borchers\*, Christoph Buettner, Martin Schmutzler

Helios Klinikum Erfurt:

Gerald Burgard\*, Alexander Lucht, Jan Wagner

University Hospital Witten/Herdecke, Helios Klinikum Wuppertal:

Stefanie Pilge, Gerhard Schneider\*, Gisela Untergehrer

Fachkrankenhaus Coswig GmbH Coswig:

Beata Bis, Jens Krassler\*

Georgius-Agricola-Klinikum Zeitz:

Jan Dittmann, Jörg Haberkorn\*

SANA-Kliniken Sommerfeld:

Jürgen Eberitsch\*, Karola Eberitsch, Thomas Nippraschk, Ulrich Wepler

University Hospital Erlangen:

Wolf-Christian Engelen, Carla Nau, Axel Scholler, Jürgen Schüttler\*, Simone Wintzheimer

Jena University Hospital:

Frank Bloos, Anke Braune, Daniela Fergen, Katrin Ludewig, Markus Paxian, Konrad Reinhart\*

Klinikum Saarbrücken:

Nikolaus Graf\*, Konrad Schwarzkopf

Charité-Universitätsmedizin Berlin, Campus Charité Mitte:

Katharina Berger, Marit Habicher\*, Ruta Kasperiuonaite, Sabine Savelsberg

St. Johannes-Hospital Duisburg:

Henning Krep, Michael Reindl, Matthias Weber\*

Municipal Hospital Munich:

Wolfgang Bauer, Florian Bingold, Saskia Christ, Patrick Friederich\*, Reza Kaviani

Asklepios Klinikum Bad Abbach:

Patrick Auer\*, Georg Bonnländer, Jürgen Drescher

Fürst-Stirum-Klinik Bruchsal:

Roland Braun\*, Tim Eichenauer, John Kerner

Klinikum Lippe-Detmold:

Kathrin Bierbaum, Horst Brünner, Stefan Grond\*, Ursula Perez-Platz

DIAKO Flensburg:

Bent Andresen\*, Ulf Linstedt, Nils Stegmann

Hochwaldkrankenhaus Bad Nauheim:

Uwe Erkens\*

HanseKlinikum Wismar:

Jens Kopcke\*, Andreas Meyer

Evangelische Lungenklinik Berlin:

Hartmut Brestrich\*, Sandra Ernst, Stella Merkel

Klinikum Oldenburg:

Lena Krieger, Frank Luers, Andreas Weyland\*

University Hospital of Rostock:

Gabriele Noeldge-Schomburg, Thomas Menckie\*, Christina Wasmund

Ubbo-Emmius Klinik Aurich-Norden:

Ralph-Dieter Bredtmann\*, Ines Erler, Carsten Raufhake

Elblandklinikum Radebeul:

Christine Haumann, Angela Möllemann\*, Uwe Oehmichen, Olga Sergejew

Krankenhaus Lübbecke:

Brigitte Lehning\*

Klinikum St. Georg:

Elke Czeslick, Michaela Geyer, Michael Malcharek, Armin Sablotzki\*, Marina Stier

University Hospital UKAachen:

Florian Feld, Gernot Marx\*, Rolf Rossaint, Verena Simon

## Greece

### National Co-ordinators

Apostolos Armaganidis, Despoina Koulenti, University General Hospital Attikon Athens

### Evangelismos General Hospital Athens:

Anastasia Kotanidou\*, Serafim Nanas, Androula Papastylianou, Aikaterini Psevdi, Anastasios Stathopoulos

### General Hospital of Athens:

Asklepieion Voulas, Efthymia Kanna, Anastasia Koutsikou\*, Alexandra Moustaka

### General Hospital of Larissa:

Achilleas Chovas, Apostolos Komnos\*, Tilemachos Zafiridis

### Papanikolaou General Hospital Thessaloniki:

Josef Franses, Athena Lavrentieva\*, Eleni Koraki

### Erythros Stavros (Red Cross) General Hospital of Athens:

Chrysostomos Katsenos\*, Maria Flora Kasianidou, Pantelia Nasopoulou, Eleni Spyropoulou

### Gennimatas General Hospital Thessaloniki:

Chrysoula Gousia, Constantine Katsanoulas\*, Dimitrios Lathyris

### General Hospital of Lamia:

George Kyriazopoulos\*, Dimitrios Sfyras, Athanasia Tsirogianni

### Attikon University Hospital Athens:

Apostolos Armaganidis, Georgia Kostopanagiotou, Despoina Koulenti\*, Mihail Lignos, Paraskevi Matsota

### General Hospital of Pyrgos:

Christos Christopoulos\*, Alexandra Mouratidou, Efstratia Vrettou

### Creta InterClinic Hospital Heraklion:

Spyros Boufidis, Eleni Moka\*

University Hospital of Ioannina:

Eleni Arnaoutoglou, Vasileios Koulouras\*, George Nakos, Georgios Papathanakos

251 General Air Forces Hospital Athens:

Georgios Anthopoulos\*, Georgios Choutas, Dimitrios Karapanos, Vaso Tzani

Aretaieion University Hospital Athens:

Georgios Gkiokas\*, Konstantinos Nastos, Fotios Nikolakopoulos

University Hospital of Alexandroupolis:

Christos Dragoumanis, Nikos Nikitidis, Ioannis Pneumatikos, Vassiliki Theodorou\*, Danai Zacharouli

Iaso General Hospital of Thessalia Larisa:

Stella Kandi, Konstantinos Tasopoulos\*

General Hospital of Thessaloniki G. Papageorgiou:

Kostoula Arvaniti\*, Dimitrios Matamis, Eva Mplougoura, Polixeni Petropoulou, Ioannis Soumpasis

AHEPA Hospital Thessaloniki: Ekaterini Amaniti, Maria Giannakou-Peftoulidou\*, Eleni Gkeka, Ioanna Soultati

Sismanogleio General Hospital Athens:

Maria Kokinou, Lambrini Papatheodorou, Maria Stafylaraki\*

Hippokration General Hospital Thessaloniki:

Tatiana Giasnetsova, Nikoleta Gritsi-Gerogianni\*, Christina Kydona

General Hospital of Molai:

Olga Kiskira\*, Ioannis Koulentis

General Hospital of Athens 'NIMITS':

Alexandros Apsokardos, Konstantinos Dimitropoulos, Ourania Soldatou\*

General Hospital of Arta:

Christodoulos Nathanail, Alexios Papazotos, Pirros Tsakas\*

Thriassion General Hospital Athens:

Phyllis-Maria Clouva-Molyvdas\*, Athina Kolotoura, Monika Sartzi

Peiraiko Therapeftirio Pireus:

Spiros Papanikolaou\*, Pavlos Polakis

Hippokratio General Hospital of Athens:

Stylianios Karatzas\*, Aikaterini Kyparissi, Theonymfi Papavasilogpoulou

General Hospital of Trikala:

Triantafillia Koukoubani\*, Evangelia Mastora, Kyriaki Spyropoulou-Pagdatoglou

University Hospital of Crete Herakleion:

Vasileia Nyktari\*, Polychronis Malliotakis, Alexandra Papaioannou

Naval Hospital of Athens:

Vasileios Bekos\*, Elisavet Maragkou, Anna Spring

General Hospital of Korinthos:

Stavros Evagelatos, Aikaterini Ioakeimidou\*, Nikos Noulas

## Hungary

National Co-ordinator

Zsolt Molnár, University of Szeged

University of Szeged:

Zsolt Molnár\*, Emese Csüllög, Enikő Elekes, Tamás Molnár

Flor Ferenc County Hospital Kistarcsa:

Zsuzsana Katona, Ildiko Kremer\*, Angela Miko

Semmelweis University, Budapest:

Akos Csomos\*, Zsuzsanna Galambos, Akos Szucs

Balassa Janos Country Szekszard:

Gyorgy Nyikos\*, Gabor Szekeres, Ervin Szabo

Zala County Hospital:

Katalin Kranitz, Melinda Simon\*

Telki Kórház:

Janos Szigeti\*

Pándy Kálmán County Hospital:

Emánuel Gaál, Attila Havas\*, Alexandru Ille

MISEK Non-profit Kft Semmelweis Hospital: Krisztina Bráz, Geza Nagy\*



## **Iceland**

National Co-ordinator

Gisli Sigurdsson, Landspítali University Hospital Reykjavík

Landspítali University Hospital Hringbraut:

Fridrik T Sigurbjörnsson, Gisli H Sigurdsson\*

Landspítali University Hospital Fossvogur:

Sigurbergur Kárason\*, Elin Edda Sigurdardóttir

Sjúkrahúsið á Akureyri:

Ásbjörn Blöndal\*

Sjúkrahúsið á Akranesi:

Björn Gunnarsson\*

## **Ireland**

National Co-ordinator

Andrew Westbrook, Midland Regional Hospital Mullingar

Cork University Hospital:

Alan Broderick\*, Parvaiz Hafeez, Deepak Hanumanthaiah

Mercy Hospital Cork:

Janette Brohan\*, Donal O'Chroinin

Letterkenny General Hospital:

Kevin Bailey\*, Karthik Ramamoorthy

Beaumont Hospital Dublin :

Yvonne Doyle, Noelle Freir\*, James O'Rourke

Mater Misericordiae University Hospital Dublin:

Philip Jonson, Sabir Saeed\*

The Rotunda Maternity Hospital:

Ivan Hayes\*, John Loughrey

St. Vincent's University Hospital:

Stephen Frohlich\*, Nuala McCauley, Donal Ryan

Tallaght Hospital:

Gerry Fitzpatrick\*

University College Hospital Galway:

Leo Kevin\*, Jubil Thomas

Midland Regional Hospital Portlaoise:

Barry Warde\*

Our Lady of Lourdes Hospital Drogheda:

Alan Woolhead\*

Mayo General Hospital Castlebar:

Michelle Duggan\*

Midland Regional Hospital Tullamore:

Cara Egan\*

Sligo General Hospital:

Seamus Crowley\*, Soloman Lebese

Midland Regional Hospital Mullingar:

Anne Bergin, Andrew Westbrook\*

Cavan General Hospital:

Rory Page\*

St James's Hospital Dublin:

Daniel Collins, Michael McKenny\*

## Italy

National Co-ordinators

Giorgio Della Rocca, University of Udine

Salvatore Grasso, Università degli Studi "Aldo Moro" di Bari

Azienda Sanitaria Ospedaliera Cardinal Massaia:

Anna Bresciani, Livio Carmino, Silvia Ghelfi, Laura Lorenzelli, Maria Teresa Novelli, Chiara Pescarmona, Agostino Roasio\*

Ospedale Ceccarini Riccione:

Alessandro Gatta\*, Mauro Nastasi, Manlio Sanseverino, Carla Tinti

Ospedale S. Valentino Montebelluna:

Andrea Bianchin\*, Maria Tormena

Ospedale S. Maria Nuova Firenze:

Antonio Franco\*, Federica Marini

University Of Milano Polo Universitario Ospedale San Paolo:

Piero Di Mauro, Francesca Rapido, Concezione Tommasino\*

European Institute of Oncology, Milan:

Ferdinando Bellotti, Daniele Boninsegna, Gianluca Castellani, Daniele Sances\*, Gianluca Spano, Stefano Tredici, Dario Vezzoli

Cesat Ospedale S. Pietro:

Igneo Fucecchio, Alessandro Bacci, Roberta Coppini, Sandro Dell'unto, Emanuele Mori\*, Maria Rosa Stanzani, Monica Tosi

Nuovo Santa Chiara Pisa:

Michele Collareta, Francesco Forfori\*, Matteo Franchi, Giuseppe Mancino

Institute for Cancer Research and Treatment:

Massimo Battistella, Elisa Baricocchi, Francesco Bona\*, Felicino Debernardi, Gianmarco Giacometto, Antonio Iacobellis, Paolo Massucco, Nora Moselli, Andrea Muratore, Graziella Palomba, Elena Sardo, Michele De Simone, Luisa Suita, Edoardo Zocca

Maggiore Della Carità, Novara:

Barbara Bucci, Francesco Della Corte, Tiziana Piciuccio, Valeria Viarengo\*

Italian National Research Centres on Aging:

Gabriella Bettelli, Eugenia Cantarini, Marina Giampieri, Alessandra Tanfani\*, Eugenio Recchia

IRCCS S. Raffaele Milano:

Elena Bignami, Giovanna Bruno, Roberto Costagliola, Azzurra Gandolfi, Massimiliano Greco, Rosalba Lembo, Giacomo Monti\*, Elisa Nicelli, Nicola Pasculli, Stefano Turi

University of Udine AOU:

Giorgio Della Rocca\*, Antonio Baroselli, Marcella Brazzoni, Mattia Buttazoni, Stefania Buttera, Carlo Centonze, Giovanni Serena, Lorenzo Spagnesi, Ilaria Toretto, Anna Vilardi, Ester Zearo

Niguarda Ca' Granda Hospital-Milan:

Ines Arpino\*, Sara Baraldi, Chiara Guarnerio, Vincenzo Molene

Azienda Ospedaliera Per L'emergenza Cannizzaro:

Maria Concetta Monea, Enrico Vaccarisi, Luigi Vicari\*

Azienda Policlinico Umberto I Sapienza University:

Alida Albante, Marco Aversano, Cinzia Loiacono, Maurizio Marandola\*

Policlinico S.Orsola-Malpighi Bologna:

Maurizio Fusari\*

Azienda Ospedaliera Desenzano:

Nicola Petrucci\*

Catholic University Hospital A Gemelli:

Amerigo Galla, Antonio Mascia, Paolo Primieri\*

IRCCS AOU San Martino-IST, Genova:

Anna Di Noto, Angelo Gratarola, Alessandro Molin, Paolo Pelosi, Luigi Spagnolo\*, Claudio Spena

Orlandi Bussolengo:

Plinio Calligaro\*, Simonetta Marchiotto, Alberto Merlini, Eleonora Pedrazzoli, Giulia Perina, Renea Visentin

S. Gerardo Monza:

Roberto Fumagalli\*, Andrea Garbagnati, Bruna Manetti, Chiara Snaier, Marta Somaini

Ospedale S.Maria Di Ca' Fooncello Treviso:

Antonio Farnia, Roberto Nani\*, Novello Pierantonio

Azienda Ospedaliero-Universitaria Consorziale Policlinico di Bari:

Michele De Michele, Salvatore Grasso\*

Policlinico Umberto I Università Di Roma La Sapienza:

Sergio Gazzanelli\*, Maurizio Marandola, Francesco Pugliese, Franco Ruberto\*

Azienda Ospedaliero-Universitaria S. Anna of Ferrara:

Elena Bergamini, Tania Tassinati, Maurizia Capuzzo\*

A.O.U. Federico II:

Vera Cirillo, Rosalba Tufano\*

Azienda Sanitaria Firenze Ospedale Del Mugello:

Roberto Oggioni\*, Vieri Parrini

Ospedale Civile Di Macerata:

Emanuela Brunori, Micaela Capone, Luigi Carbone, Francesco Corradetti, Daniele Elisei, Stefano Fiorentino, Maurizio Francesconi, Diego Gattari, Maria Gorgoglione, Emanuele Lacobone, Francesco Minnucci, Claudio Montironi, Gianrenato Riccioni, Giuseppe Tappata\*, Valeria Zompanti, Paola Verdenelli

Azienda Ospedaliero Universitaria San Giovanni Battista di Torino:

Elisabetta Cerutti\*, Vito Marco Ranieri

## Latvia

National Co-ordinator

Iveta Golubovska, State Hospital of Traumatologu and Orthopaedics Riga

Riga East University Hospital Gailezers Clinics:

Sergejs Grigorjevs, Maija Rikmane, Daina Rozkalne, Jevgenijs Stepanovs\*, Olegs Suba

State Hospital of Traumatologu and Orthopaedics Riga:

Iveta Golubovska\*, Sigita Kazune, Aleksej Miscuk

Pauls Stradins Clinical University Hospital:

Janis Nemme\*, Peteris Oss

## **Lithuania**

National Co-ordinator

Jurate Sipylaite, Vilnius University Hospital Santariskiu Clinics

Hospital of Lithuanian University of Health Sciences:

Andrius Macas\*, Vytautas Ragaisis

Vilnius University Hospital Santariskiu Clinics:

Egle Kontrimaviciute\*, Gabija Tomkute



## **The Netherlands**

National Co-ordinator

Christiaan Boerma, Medical Centre Leeuwarden

Maastricht University Medical Center:

Irene Fleur Kramer, Martijn Poeze\*

Antonius Ziekenhuis Zuidwest-Friesland:

John Maria, Gerardus Pelzer, Lex Winsser\*

University Medical Center Groningen:

Maarten Nijsten, Michiel Schoorl, Rob Spanjersberg\*

University Medical Center Utrecht:

Wolfgang Buhre, Stefan Dieleman, Wilton van Klei\*

University Medical Center ST Radboud Nijmegen:

Martijn Bouw, Peter Pickkers\*, Marieke van der A

IJsselland Ziekenhuis Capelle aan den IJssel:

Frodo Schreiner, Ria Zandvliet\*

Tweesteden Ziekenhuis Tilburg:

Roy van den Berg\*

Academic Medical Center Amsterdam:

Esther De Wit, Christiaan Keijzer, Markus Hollmann, Benedikt Preckel\*

Medical Centre Haaglanden:

Gijs van Acker, Paul Dennesen\*, Bas Veld

Albert Schweitzer Ziekenhuis:

Agnes Kuijpers-Visser, T Inan, A. Koopman-van Gemert\*, Huibert Ponsen

Medisch Centrum Leeuwarden:

Christiaan Boerma\*, Tammo Brouwer, Matty Koopmans

Erasmus MC:

Jasper van Bommel\*, Ditty van Duijn, Ben van der Hoven, Patricia Ormskerk

De Tjongerschans Heerenveen:

Oliver Beck, Sjouke Schiere, Auke Reidinga\*, Allart Venema

Isala Zwolle:

Marga Hoogendoorn, Kees Olthof\*

## Norway

National Co-ordinators

Hans Flaatten, Ib Jammer, Haukeland University Hospital

Haukeland University Hospital:

Hans Flaatten, Ib Jammer\*

University Hospital of North Norway:

Vegard Dokka, Svein Arne Monsen, Lars Marius Ytrebo\*

Haraldsplass Diakonale Sykehus:

Mostafa Noursadeghi\*

Stavanger University Hospital:

Ahmed Shahzad\*

Helse Møre og Romsdal HF, Kristiansund Sjukehus:

Ola Dagfinn Bokspas\*, Christoph Roiss, Hans Frank Strietzel

Diakonhjemmet Sykehus Oslo:

Anne Gina, Schie Berntsen\*

Førde Sentralsjukehus:

Helge Haugland\*, Svein Ove Vingsnes

Sykehuset Innlandet HF- Elverum:

Patric Axelsson, Thomas Risom Olsen\*

UNN Harstad:

Sanjay Katre\*

Sykehuset Namsos:

Kristin Aakerøy\*

## **Poland**

National Co-ordinator

Adam Mikstacki, Regional Hospital Poznan

Regional Hospital Poznan:

Barbara Tamowicz\*

10-th Clinical Military Hospital:

Dominika Bożiłow, Robert Goch\*, Piotr Grabowski, Jacek Kupisiak, Małgorzata Małek, Robert Szyc

District Hospital Ostrów Wielkopolski:

Włodzimierz Kostyrka\*

District Hospital Śrem:

Robert Choma\*

District Hospital Konin:

Grzegorz Jankowski\*

Szpital Wojewódzki SP ZOZ Zielona Góra:

Władysław Kościelniak, Paweł Pietraszek\*, Bartosz Szarowar

## Portugal

National Co-ordinator

Ricardo Matos, Hosp. St António dos Capuchos, Centro Hospitalar de Lisboa Central, EPE, Lisbon, Portugal

Centro Hospitalar de Lisboa Norte, Hospital de Santa Maria:

Carlos França, António Pais Lacerda, Lucindo Ormonde\*, Rosário Rosa, Inês Pereira, Paula Vitor

Centro Hospitalar de Lisboa Norte, Hospital Pulido Valente:

Henrique Completo Bento\*, Maria Raquel Lopes, Marques Carvalho, Manuela Faria, Ana Cláudia de Sousa, Pereira de Freitas

Hospital Garcia de Orta:

Eduardo Almeida\*, Rui Mealha, Rachel Vicente

Centro Hospitalar do Porto, Hospital de Santo António:

Raquel Monte, Fernando Rua\*

Centro Hospitalar Trás-os-Montes e Alto Douro:

Nelson Barros, Francisco Esteves, Célia Maria Gouveia Pinheiro, Vila Real\*

Hospital de São Teotónio, EPE Viseu:

Vítor Miguel Oliveira\*, Maria Fátima Oliveira, Isabel Martins, José Pedro Saraiva, José Pedro Assunção

Centro Hospitalar do Alto Ave:

Anabela Bártolo\*, Anabela Carvalho, Carlos Correia, Salomé Martins, Ruth Milheiro

Hospital de São Bernardo:

Alejandro Diaz, Maria Imelda Gonçalves, Rosa Ribeiro\*

Centro Hospitalar do Barlavento Algarvio EPE: Joana Estilista\*, Carlos Glória

HPP Hospital de Cascais:

José de Almeida, Filipa Barros, Armino Ramos\*

Hospital Central do Funchal:

Margarida Camara, Edward Richard Maul\*, Julio Nobrega

Hospital do Divino Espirito Santo EPE:

Anuscka Langner, Dionísio Faria Maia\*

Instituto Português de Oncologia do Porto FG EPE:

Ofélia Afonso, Filomena Faria\*, Sofia Serra

Hospital de Curry Cabral:

Maria Manuela Botelho, Pedro Ferreira, Luís Mourão, Ana Vintém Oliveira\*, Margarida Resende

Hospital de Faro EPE:

Miguel Aleman, Jorge Fonseca\*, Marta Isidoro, Helena de Meneses, António Pêgas, José Pereira, Luis Pereira, Bárbara Ramos

Hosp. St António dos Capuchos, Centro HoSpitalar de Lisboa Central, EPE:

Francisco Matos, Ricardo Matos\*

Hospital de Santa Marta:

Maria de Lurdes Gonçalves Castro\*, Ana Martins, Cristina Ramos, Manuel de Sousa

Hospital de São José:

Luís Bento, Conceição Botas\*, Vitor Lopes, Rosa Mendes

## Romania

National Co-ordinator

Ioana Grigoras, University of Medicine and Pharmacy

St. Spiridon Emergency Clinical County Hospital Iasi:

Mihaela Blaj, Mihaela Damian, Andreea Lupusoru\*, Irina Ristescu

Dr. C. I. Parhon Clinical Hospital Iasi:

Monica Codreanu, Ciresica Diaconescu\*

St. Ioan cel Nou Emergency County Hospital Suceava:

Alina Nistor, Dorin Stanescu Stelian\*, Livia Streanga

St. Andrei Emergency County Hospital Galati:

Maria Berneanu, Cristina Bordeianu, Calarasu Florenta, Alina Iacob, Mary Nicoleta Lupu\*, Iulian Mocanu, Coca Moraru, Carleta Meran, Bacalbasa Nicolae, Madalina Sandu, Roxana Turcanu

Emergency County Hospital Roman:

Florina Epure, Monica Grigore\*, Cristina Hotaranu, Nicoleta Popescu

Emergency County Hospital Piatra Neamt:

Oleg Baban, Manuela Baciu, Aurica Ciobanu\*, Catalin Ioan Denciu, Vitalie Gurau, Ion Maftei, Ion Moldovan, Liviu Ungureanu

Elias Emergency University Hospital Bucharest:

Prodan Bogdan, Dan Corneci\*, Melania Dinu, Dutu Madalina, Manolescu Rely, Negoita Silviu

Fundeni Clinical Institute Bucharest:

Dana Tomescu\*, Droc Gabriela, Stelian Adrian Dinescu

Octavian Fodor Emergency Clinical Hospital Cluj-Napoca:

Mitre Calin, Daniela Ionescu\*, Simona Margarit, Horatiu Vasian

Timisoara County Emergency Hospital No 1:

Corina Albu, Carmen Balasa, Alina Cadrigati, Dorian Dragulescu, Loredana Gavra, Ciprian Hentia, Claudiu Macarie, Mihaela Manescu, Ioan Nediglea, Dana Ocica, Bedreag Ovidiu, Marius Papurica, Cosmin Plavat, Claudia Popa, Mihaela Ramneantu, Dorel Sandesc\*, Zoran Sandici, Mihaela Sarandan

Emergency City Hospital Moinesti:

Ioana Belciu, Eugen Tincu\*

Recovery Hospital Iasi:

Irina Ursu\*

Emergency County Hospital Focsani:

Mariana Aignatoaie\*, Mariana Huzuneanu

County Emergency Hospital Cluj-Napoca:

Simona Cocu, Natalia Hagau\*

CFR Hospital Galati:

Roxana Ciubotaru\*

Emergency Clinical County Hospital Tg Mures:

Sanda-Maria Copotoiu\*, Ruxandra Copotoiu, Ghitescu Ioana, Judit Kovacs, Azamfirei Leonard, Ianos Szederjesi

City Hospital Dorohoi:

Vanvu Genoveva, Simona Mosnegutu\*



## **Serbia**

National Co-ordinator

Maja Surbatovic, Military Medical Academy Belgrade

Military Medical Academy Belgrade:

Dragan Djordjevic\*, Biljana Djordjevic, Krasimirka Grujic, Dusko Jovanovic, Ivana Krstic-Lecic, Jovana Obradovic, Snjezana Zeba

Clinical Center Kragujevac:

Jasna Jevdjic\*, Milos Miletic, Filip Zunic

Clinical Center Sremska Mitrovica:

Aleksandra Bulasevic, Radoslava Brko, Narcisa Gazibegovic, Mirjana Kendrisic\*, Radisa Vojinovic

## **Slovakia**

National Co-ordinators

Jozef Firment, L. Pasteur University Hospital Kosice

Roman Zahorec, St Elizabeth Cancer Institute Bratislava

L. Pasteur University Hospital Kosice:

Judita Capková, Jozef Firment\*, Monika Grochova, Stefan Trenkler

St Elizabeth Cancer Institute Bratislava:

Martin Griger\*, Roman Zahorec

University Hospital Martin:

Erika Bakosova, Martin Kvasnica, Beata Saniova\*, Miroslav Sulaj\*, Andrea Zacharovska

Faculty Hospital, Trnava:

Alexandra Simkova\*

University Hospital Ruzinov Bratislava:

Andrea Číková, Andrea Gebhardtova\*, Slávka Hanuljaková, Juraj Koutun, Andrea Martonová, Veronika Žilinčárová

Faculty Hospital Nitra:

Katarína Galkova\*

Hospital Nove Zamky:

Stefan Krbila, Viliam Sobona\*

National Cancer Institute Bratislava:

Marieta Ocnasova\*

## **Slovenia**

National Co-ordinator

Vesna Novak-Jankovic, University Medical Centre Ljubljana

University Medical Centre Ljubljana:

Vesna Novak-Jankovic\*, Adela Stecher, Feri Stivan, Andriy Grynyuk, Marija Damjanovska, Ivan Kostadinov, Mile Knezevic, Marko Malivojevic

UMC Maribor:

Zvonko Borovsak\*, Mirt Kamenik\*, Dušan Mekiš, Irena Osojnik

General Hospital Novo Mesto:

Lučka Kosec\*, Silva Ostojič Kapš

General Hospital Trbovlje:

Dragoslav Aleksic, Božena Gerjevič\*, Katja Kalan, Tomaz Ursic

## Spain

National Co-ordinators

Cesar Aldecoa, Hospital Universitario Rio Hortega Valladolid

Juan Montejo González, Hospital Universitario 12 de Octubre, Madrid

Corporació Sanitària Parc Taulí:

Anna Artigas, Andres Garcia, Alberto Lisi\*, Isabel Perez, Gisela Perez, Nuria Poch, Sergi Vaquer

Hospital Santiago Apostol:

Goiatz Balciscueta, Helena Barrasa, Sara Cabanes, Javier Maynar, Yolanda Poveda, Amaia Quintano Rodero\*, Ana Vallejo

Hospital General Universitario Gregorio Marañón:

Patrícia Duque, Beatriz Garcia-Bunger, Maria Adoracion Elvira, Ana María Lajara\*, María Palencia, Rafael Ramos

Complejo Hospitalario de Navarra:

Ana Saez Fernandez\*, Juan Tirapu León, Jaione Iza López, Francisco Yoldi Murillo, Eva Turumbay Ramirez, Patricia Unzué Rico, Marta Patricia, Martín Vizcaíno

Hospital Sant Joan Despí Moisès Broggi:

Maria José Bernat Álvarez, Kenneth Planas Real, Arantxa Mas Serra\*

Hospital Universitario de Mostoles:

Norma Aracil, Begoña Menendez Bodega, Raquel Fernández García, Marivi Álvarez García, Borja de la Quintana Gordon\*, Alicia Gutiérrez Jodrá, Angela De Santos López, Juan José Llavador Ros, Rocío Ayala Soto, Isabel Sepúlveda

Complejo Asistencial Universitario de León:

Esperanza Pascual Díez, Luisa Fernández Fernández, Carlos Soria Gulina\*

Complejo Hospitalario de Ourense:

Laura Pérez Arviza, Lorena Mouriz Fernandez, Antía Río Gómez, Concepción Alonso Martínez, Ana Belén Rodríguez Rodríguez, Carmen Lopez Soto\*

Hospital Universitario Rio Hortega:

Cesar Aldecoa\*, Clara Garcia, Mario Lorenzo, Elena Pinilla, Jesus Rico, Irene Ruperez

Hospital Universitario La Paz:

Eduardo Alonso, Fernando Leira, David Pestaña Emilio Maseda, Concepcion Royo\*, Jose Villagran

Hospital Municipal de Badalona:

Giralt Murillo Candi, Garcia Eduardo Esteva, Raquel Mansilla Folgado, Nadal Joan Fornaguera, Pijoan Calonge Montse, Anna Sape Prat, Dolores Sintes\*

Clínica Asisa Santa Isabel:

Donaldo Arteta Arteta\*, Horacio García Delgado, Juan Fajardo López-Cuervo, Mikel Celaya López, Alejandro Ramírez, Francisco José Saldaña

Hospital Universitario 12 de Octubre:

Pilar Aliste, Ana Hermira Anchuelo, Ascensión García Campos, Mercedes Catalán, Mónica García Gómez, Olga Gonzalez Gonzalaez, Eloísa López López\*, Isabel Real Navacerrada, Sara Arlanzón de Quevedo, Matilde Gonzalez Serrano, Francisco Perez-Cerdá Silvestre, Francisco Martinez Torrente

Hospital Clinico Universitario Valencia:

Blanca Arocas, Ernesto Pastor Martinez\*, Marina Soro

Hospital San Juan De Dios Aljarafe:

Fernando Maroto\*

Hospital La Fe Valencia:

Ruth Robledo Algarra, Inés Silla Aleixandre, Gemma Rodriguez Argente\*, Ana Broseta Lleó, Antonio Vela Rubio, José Luis Vicente Sánchez, Irene Enríquez Valcárcel

Hospital Clinic Barcelona:

Clara Balust, Jaume Balust\*, Xavier Borrat, Maria Jose Carretero, Isabel Gracia, Purificacion Matute, Jordi Mercadal, Roger Pujol, Beatriz Tena, Marta Ubre

Hospital Universitario Vall d'Hebron, Barcelona:

Dolores Dorda Albalad, Concepción Muñoz Alcaide, Jesus Caballero, Angels Camps Cervantes, Miriam de Nadal Clanchet\*, Nuria Montferrer Estruch, Mercè Ballvé Ferrer, Albert Lacasta Fornells, Eduard Terrer Galera, Irene Garcia Martinez, Susana Manrique Muñoz, Andres Pelavski, Pilar Tormos Perez, Miguel Angel Gonzalez Posada, Ivette Chocron de Prat, Jordi Rello\*, Llum García Serrano, José Manuel Naya Sieiro, Lorena Silva, Maria Jose Colomina Sole, Alfons Biarnes Suñé, Isabel Rochera Villach

Hospital Clínico Universitario Valladolid:

José Ignacio Gómez Herreras\*, Rodrigo Poves, Beatriz Martínez Rafael, Icier Martínez Almeida, Ángel Fernández Collates

Hospital Universitario Marques de Valdecilla:

Maria Jose Bartolomé, Bonifacio Cimadevilla, Antonio Manuel González González, Jose Manuel Rabanal Llevot\*, Juan Carlos Díaz de Terán Mira, Begoña González Molina, Sara Pardo, Carlos López Sánchez, Monica Williams, Estibaliz Zaldibar

Hospital Universitario de Guadalajara:

Lourdes Muñoz Corsini, José Ramón Rodríguez Fraile\*, María de la Lastra, Monir Kabiri Sacramento, Francisco Javier López Saña

Hospital Universitari Mutua Terrassa:

Josep Trenado Álvarez\*

Hospital Universitario Virgen Macarena:

María Luisa Cantón Bulnes\*, Violeta Gándara Carrasco, M<sup>a</sup> del Rocío Míguez Crespo, Diana Narváez Cubillos, Enrique Laza Laza, M<sup>a</sup> del Pino Heredia Pérez, Ángel Arenzana Seisdedos, Bartolomé Fernández Torres

Hospital Universitario De La Princesa:

Marian Santos Ampuero\*, Marta Chicot Llano, Esperanza Mata, Manuel Muñoz, Mar Orts, Antonio Planas, Fernando Ramasco, Carlos Roman

Hospital Montecelo Complejo Hospitalario de Pontevedra:

Marina Varela Durán\*, Sabela del Río Fernández, Yolanda Sanduende Otero, Susana Lopez Pineiro, Cristina Barreiro Pardal

Hospital Universitario Príncipe de Asturias:

Jesús Fernández Alcantud, Mercedes Ayuso Antolinos\*, Francisco Barrios, Ana Collantes Casanova, Manuel Ruiz Castro, Beatriz Infantes Crespo, Uzuri Lancha Felipe, Marta Liceras Fuster, Máximo Sanz García, Begoña Herrero Garrote, Ricardo Moreno Gonzalez, María José Montes Granero, Carlos Lloreda de la Guía, Raquel Chaves López, Santiago de Frutos López, Jose Javier Marco Martínez, Ángel García Mostaza, Antonio Jiménez Moreno, Irene Riquelme Osado, Ana Bardina Pastor, Rosa Peña, Mónica Rustarazo Pérez, María Aliaño Piña, Carlos Aranda Romero, Elena Rodríguez Rodríguez, Vicente Pedroviejo Sáez, Fernando Safatle, Javier Hernández Salvan, Mar Galán Sampedro, Patricia Alfaro de la Torre, Jonatan Pérez Toro, Crsitina Lasa Unzúe, María José Vargas

Hospital Universitario de Valme:

David Garcia Bernal, Mercedes Echevarria\*, Alejandro Ubeda Iglesias, Ana Loza, Araceli Rodriguez Morillo, Pedro Diaz Serrano, Fernando Caba Barrientos Sevilla

Clínica Universidad de Navarra:

Elena Cacho, Ricardo Calderón, Mercedes Dufur, Carolina Marginet, Pablo Monedero\*, Maria José Yepes

Complejo Hospitalario Universitario de A Coruña:

Luzdivina Rellán Alvarez, Francisca Fernández Carballal, Alberto Pensado Castiñeiras, Paula Dieguez García, Lorena Ramos López, Pablo Rama Maceiras\*, María Socorro Martínez Puente, Maria Teresa Rey Rilo

Hospital General de La Palma:

Ana Esther Trujillo Alonso, Sonia Rodríguez Fernández, Rafael Omaña García, Aníbal Pérez García, Rafael Bello Puentes\*

Hospital Universitario Lucus Augusti:

Domingo Nunez Aguado, Carlos Lopez Carballo, Ricardo Fernandez Fernandez, Amadeo Toledo Presedo, Ricardo Bermejo Diaz de Rabago\*, Ana Rodriguez Velasco

University Hospital Germans Trias i Pujol:

Yolanda Jiménez Capel, Ana Fernández Cortés, Esther Martínez García, Laura Martinez Gimeno, Jordi Klamburg, Rosa Castillo Omedas\*, Miriam González Núñez, Clara Llubia Maristany, Enrique Moret Ruiz

Hospital Sant Pau:

Xavier Artigas, Sebastian Castrillón, Nieves Espinosa, Ana M<sup>a</sup> Gomez-Caro, Susana Illa, Inmaculada India, Beatriz Martín-Huerta, Victoria Moral\*, Marisa Moreno

Hospital Universitario Central De Asturias Oviedo:

Cristina Iglesias Fernández, Violeta Fernández García\*, Pedro Picatto Hernández

Hospital MD Anderson Madrid:

Angel Alberto Honrubia Checa\*, David Salvatierra Diaz, Manuel Linero Noguera, Ignacio Pujol Varela

Hospital Clinico San Carlos Madrid:

Miguel González Gallego, Oscar Martínez García, José Javier Ariño Irujo, Carlos González Perrino, Julio Rey Picazo, Francisco López Timoneda\*

Hospital Ramón y Cajal:

María Manzanero Arroyo, Isabel Albalá Blanco, Marcos Martínez Borja, Sara Martín Burcio, Nilda Martínez Castro, Aránzazu Puente Cerdeiriña\*, Marta de la Torre Concostrina, Medrano Viñas Cristina, Trinidad Dorado Díaz, Juan Avellanosa Esteruelas, Ildfonso Ingelmo Ingelmo, Paco Duran Insuga, Elisabeth Claros Llamas, Jose Juan Martín Lopez, María Beltran Martín, Elena Elías Martín, Eva Ureta Mesa, Manuela Loren Monterde, Paloma Alonso Montoiro, Maria Luisa Gonzalez Móstoles, Eva Velasco Olarte, Adolfo Martínez Pérez, Fernando Domínguez Perez, Ana Serrano Romero, Diego Parise Rous, Nuria Mané Ruiz, Jose Angel Palomo Ruiz, Alvaro Ruigomez Saiz, Alvaro de la Vega Terol, Angel Candela Toha, Fernando Alvarez Utrera

Hospital Donostia:

Fermín Alberdi, Itxaso Elósegui, Javier García, Pilar Marco Garde\*, Escudero Itziar Mintegui, Iker García Sáez, Estibaliz Salas, Mercedes Zabarte

Sant Camil (ConSORCI Sanitari Del Garraf):

Rosa-Maria Diaz-Boladeras, Emilio Mora-Guevara\*, Julia Ferreras Zamora

Clinica Girona:

Alfons Bonet\*, Lidia Salo

Policlínica Guipúzcoa:

Unai Salinas, Juan Zaballos\*

Hospital del Henares:

Ana Abella Alvarez\*, Carlos Jimenez Garrido, Juan Ramón Hita Roa, Federico Gordo Vidal

Hospital San Jorge Huesca:

Jorge Garcia-Egea, Monica Zamora Elson, Carlos Seron-Arbeloa\*

Hospital Manacor:

Miguel Angel Mendiola Asensio, Rosa Gastaldo Simeón\*

Fundacion Jimenez Diaz-Capio:

Luis Enrique Muñoz Alameda\*, Guillermo Oeding Angulo, Monserrat Aranzubia, Jose Juan Arcas, Julian Arevalo, Belén Quesada Belvert, César Pérez Calvo, Marta Cremades, Pascual Crespo, Ana Cuarental, Mercedes Del Olmo, Pablo Turrión Fernández, José Luis Franqueza García Isabel Garcia Vega, Elena Herrera, Miguel Angel Alcala Llorente, Cecilia Martin Rabes, Ana Gamo de Maeyer, Manuel Pérez Marquez, Diego López Mendoza, José María Milicua Muñoz, Natividad Arias Martínez, Arnoldo Santos Oviedo



Hospital Universitario La Ribera Alzira:

Pau Benavent Garrigues, José Alonso Íñigo, Sergi Tormo Ferrandiz, Silvia Sanchez-Morcillo, Matilde Lafuente Sánchez, Asunción Marqués Parra\*, Sonia Gomar Vidal

Hospital Clínico Universitario Lozano Blesa Zaragoza:

Raquel Montoiro Allué, Begoña Zalba Etayo, Raquel Bustamante Rodriguez\*, Luis Martin Villen

Hospital Universitari De Sant Joan D'Alacant Alicante:

Cristina Molla Jimenez, Ricardo Salas de Zayas, Cristina Dolera Moreno, Fernando SanJose Pacheco, Jose Luis Anton Pascual\*

Infanta Cristina Parla:

Fernando Tejera Gude, Eva Manteiga Riestra\*

Hospital Universitario Virgen de la Victoria Malaga:

Francisco Cota Delgado, Maria Victoria de la Torre Prados\*

Arnau de Vilanova:

Javier Barrios, Manuel Cervera-Montes\*, Mercedes García-Sanz, Vicente García, Guillermo Sanmiguel

Hospital Puerto Real-Cadiz:

Julian López Álvaro, Beatriz Bornay Barrachima, Francisco Jose Romero Bermejo, Alberto Garcia Fernandez Pilar Martinez Garcia\*, Carolina Navarro Ramírez, Jorge Gómez Ramos

Clinica Asunción Tolosa:

Luis Angel Samaniego\*

Hospital General de Castellón:

Alberto Belenguer-Muncharaz, Amparo Ferrándiz-Selles\*, Maria-Lidon Mateu-Campos

Hospital Universitario Nuestra Señora de Candelaria Tenerife:

David Domínguez, Elena Espinosa\*, Teresa León

Hospital Universitario de Gran Canaria Doctor Negrín:

Nazario Ojeda Betancor, Javier Garcia Cortes\*, Juan José Díaz Díaz\*

Hospital Universitario de Basurto:

Ana Manzano Canalechevarria, Beatriz Fores Novales, Jose Manuel Garcia Peña, Tomas Rodriguez Delgado, Beatriz Santamaria Roquerio, Juan Jose Gomez Sainz\*, Teresa Tebar Soto

## Sweden

National Co-ordinators

Michelle Chew, Skåne University Hospital Malmö

Heléne Seeman-Lodding, Sahlgrenska Universitetssjukhuset Göteborg

Sahlgrenska Universitetssjukhuset Göteborg:

Peter Dahm, Helena Odenstedt Hergès, Christoffer Lundborg, Heléne Seeman-Lodding\*, Sören Söndergaard, Christian Rylander

Linköping University Hospital:

Ferenc Sari, Anna Oscarsson Tibblin\*

Lund University Hospital:

Anne Adolfsson, Bengt Klarin\*, Susann Schrey

Skåne University Hospital Malmö: Michelle Chew, Edyta Merisson\*, Jörgen Rydén

South Stockholm General Hospital Södersjukhuset:

Mona Britt Divander, Annika Hedin\*, Daniel Hedlund, Mikael Axelsson Lindkvist

Central Hospital Kristianstad:

Monir Jawad\*

Karolinska University Hospital Huddinge:

Lona Layous, Jan Wernerman\*

Karolinska University Hospital Solna:

Håkan Björne\*, Olof Brattström, Staffan Olheden, Anders Oldner, Eva Sellden

## Switzerland

National Co-ordinators

Bernhard Walder, Nadine Wickboldt, Hôpitaux Universitaires de Geneve

Hôpitaux Universitaires de Geneve :

Nadine Wickboldt\*

Centre Hospitalier Universitaire Vaudois :

Ariane Rossi, Luzius Steiner\*

Kantonsspital St.Gallen:

Mirjana Djurdjevic, Roger Lussmann\*

Stadtpital Triemli Zürich:

Martin Geisen, Christoph Hofer\*, Matthias Turina

## United Kingdom

National Co-ordinators

Mike Grocott, Southampton University Hospital

David Goldhill, Royal National Orthopaedic Hospital London

James Paget University Hospital:

Lynn Everett, Katy Harris, Maggie Wright\*

Derriford Hospital:

David Adams, Lorraine Alderson, Julie Baker, Iain Christie, Colin Ferguson, Matthew Hill, Kate Holmes, Andrew Hutton, Gary Minto\*, Paul Moor, Andrew Porter, Richard Struthers

Barts and The London NHS Trust:

Niven Akotia, Alaa Belhaj, Serene Chang\*, Enrique Collantes, Katrin Eigener, Michael Husband, Ahsun Khan, Ming-Li Kong, Eleanor Jane McAlees, Neil MacDonald, Edyta Niebrzegowska, Wendy Parnell, Amanda Smith, Rupert Pearse

University College London:

Ally Chhatwal, Smriti Jhingan, Richard Muswell, Yoyo Poon, Nidhita Singh, Robert Stephens\*, Robin Vasan, Nicola Waife, Tahmina Weda

Royal Glamorgan Hospital:

Adrian Clarke, Tamas Szakmany\*

Norfolk and Norwich University Hospital:

Simon Fletcher\*, Melissa Rosbergen

Queen Elizabeth Hospital:

Mark Blunt\*, Liz Prince, Kate Wong

Royal National Orthopaedic Hospital:

David Goldhill\*, Ram Kumar, Sarah Stilwell

Heart of England NHS Trust:

Keith Couper, Neil Crooks, Fang Gao-Smith\*, Teresa Melody, Catherine Snaith, Jaimin Patel, Dhruv Parekh, Joyce Yeung

Northwick Park Hospital:

Bernadette Loughnan\*, Vas Moosajee, Tamsin Rope

Central Middlesex Hospital:

Liam Edger\*

Kings College Hospital:

Julie Dawson, Daniel Hadfield, Phil Hopkins\*, Lisa McDonald, Chris Willars

Royal Lancaster Infirmary:

Gillian Campbell, Jayne Craig, Andrew Smith\*

Hammersmith Hospital:

Karleen Ladipo, Geoff Lockwood\*, Juan Moreno

Royal Derby Hospital:

Ruth Ballington, Sibongilele Hamandishe, David Rogerson\*

Medway Maritime Hospital:

Sarah Cowman, Paul Hayden\*, Nuno Pinto, Taj Sandhar

Broomfield Hospital:

Dilshan Arawwawala\*, Lauren Brotherston, Christine Mitchell-Inwang, Helena Walsh

Cambridge University Hospitals NHS Trust:

Famila Alagarsamy, Serena Goon, Sylvia Karcheva, Amy Krepska, Brian McKinney, Vishal Patil\*

Royal Devon and Exeter Hospital:

Nicholas Batchelor, Christopher Day\*, Louise Finch, Charlie Gibson, Matthew Grayling, Sheena Hubble, William Key, Thomas Knight, Alexander Loosley, Paul Margetts, Hannah Stewart

Bristol Royal Infirmary:

Jeremy Bewley\*, Katrina Hurley, Ruth Murphy, Catherine Philpott, Kathryn Pollock, Katie Sweet, Matthew Thomas, Katy Tucker, David Windsor

Manchester Royal Infirmary:

Daniel Conway\*, Steve Gold, Tanviha Quraishi

Blackpool Victoria Hospital:

Jason Cupitt\*, Sally Baddeley

Western General Hospital Edinburgh:

John David Brown, Irwin Foo\*, Damien Mantle

Royal Surrey County Hospital:

Peter Carvalho, Sam Huddart, Justin Kirk-Bayley\*, Rebecca Smith

Sherwood Forest Hospitals NHS Trust:

Lisa Milligan\*, Sonia Poulouse, Som Sarkar

Royal United Hospital Bath:

Jerry Nolan\*, Emma Pedley, Andrew Padkin

Manor Hospital:

Siamak Pesian\*, Satish Rajamanickam, Konnur Ramkumar

Scunthorpe General Hospital:

Jerry Thomas\*

Maidstone Hospital:

Alison Crayford, Angus Turner\*

Papworth Hospital Cambridge:

Fiona Bottrill, Stephen Webb\*

Royal Marsden Hospital:

Shaman Jhanji, Niall MacCallum\*, Kate Wessels, Tim Wigmore

Glasgow Royal infirmary:

Alistair Meikle, Stephen Wilson\*

Royal Sussex County Hospital:

Stuart White\*

Royal Liverpool University Hospital:

Andrew Bonnett, Andrew Rushton, Colin Williams, Oliver Zuzan\*

South Devon Healthcare NHS Trust:

Andrew Hall, Jane Montgomery, Ailie Piggot, Richard Read, Mary Stocker\*

Wexham Park Hospital:

Tiina Tamm\*

Royal Free Hospital:

Banwari Agarwal\*, Stephen Ward

Princess Alexandra Hospital:

Lucy Brown, Manju Joy, Suresh Venkatesh\*

Colchester University Hospital NHS Trust:

Thomas Hughes, Christine Mitchell-Inwang, Lajos Zsisku\*

Sunderland Royal Hospital:

Alistair Roy\*

Portsmouth Hospitals NHS Trust:

Victoria Hooper, Johanna Moulard, Jeremy Nightingale\*, Steve Rose

Royal Victoria Infirmary:

Patrick Chiam, Harnita Chohan, Chris Dickson, Sarah Gibb, Charley Higham, Caroline Harvey, Chandra Janarthanan, Laura Jones, Avinash Kapoor, Mark Moll, Louise Roberts, David Saunders\*

St Mary's Hospital, London:

Glenn Arnold\*, Claire Gibbs, Mhairi Jhurgursing, Dena Pierro, Frances Pritchard



Charing Cross Hospital:

Patrick Doyle\*, Maie Templeton, Robert Wilson, Kim Zantua

Harrogate District NHS Trust:

Thomas Collyer, James Featherstone, Rachael Worton

St Johns Hospital:

Jean Bruce, Kate McGuigan, Grant Price\*

Dorset County Hospital:

Sarah Moreton, Mark Pulletz\*

Freeman Hospital:

Helen Anderson\*, Ian Baxter, Alex Beckingsale, Mark Callaghan, Ansu Datta, Jo Dawson, Jackit Gollogly, Chris Izod, Steve Lobaz, Caroline MacFie, Manju Patel, Heather Payne, Raj Singh, Gemma Timms

Ninewells Hospital:

Shaun McLeod\*, Peter O'Brian

Glan Clwyd Hospital:

Elsbeth Horner, Vivekananda Joshi, Karen Stuart-Smith\*, Tania Seale

Southampton University Hospitals NHS Trust:

Clare Bolger, Hannah Collins, Emma Ekins, Kim Golder, Lesley Hawkins, Max Jonas\*, Karen Linford, Beverley Wadams

Chelsea and Westminster Hospital:

Madeleine Beach, Marcela Vizcaychipi\*

Frimley Park Hospital:

William Jewsbury\*

York Teaching Hospitals:

Simon Davies\*

Hull and East Yorkshire NHS Trust:

Packianathaswamy Balaji\*, Muthuraj Kangaraj, Nagesh Pissay, Neil Smith

Kent and Canterbury Hospital:

Senthilkumar Gopalakrishnan, John MacKinnon\*, Gustav Strandvik

University Hospitals Birmingham:

Ruth Francis, Adrian Jennings, Matthew Keating, Sajith Kumar, Sarah Leese, Cliona Magee, Jane Pilsbury, James Ralph, David Riddington\*, Rajneesh Sachdeva, Catherine Snelson, Suresh Vasanth, Judith Wilde

Great Western Hospital:

Beth Lavender, Rachel Lyons, Malcolm Watters\*

Scarborough Hospital:

Tim Adams\*, Simon Dyer, Lucy Tindall

New Cross Hospital Wolverhampton:

Andrew Claxton\*, Meenu Netke

Diana Princess of Wales Hospital:

Esam Akouds, Debrah Bates, Heather Gallagher, Jonathan Hatton, William Holroyd, Atideb Mitra\*, Trudy Nurse, Deborah Reed

East Surrey Hospital:

Somi Desikan\*

Croydon University Hospital:

Russell Barber, Sophie Childs\*

Kingston Hospital:

Britta O'Carroll-Kuehn\*, Mark Wyldbore

Mid Staffordshire Hospitals NHS Trust:

Ayad Al-Abdaly, Suman Amatya, Sherly Bhaskaran, Garud Chandan, Suman Chaudhry, Moses Chikungwa\*, Greg Earnshaw, Moni Grewal, Shamimul Haque, John Hawkins, Ahmed Javaid, Clare Jackson, Miriam Kamel, Ruchira Marla, Dori-Ann McCulloch, Tom Parker, Yussof Salib, Ramesh Saravanmuthu, Chris Secker, Siva Sockalingam, Anne Taylor

Perth Royal Infirmary:

Pauline Austine, Vrushali Kanade, Dora Paal, May Un Sam Mok\*

Worcestershire Royal Hospital:

Andrew Burtenshaw\*, Laura Davis, Parvez Ellahee, David Freeman, Richard Pierson, Julie Wollaston

Fairfield General Hospital:

Amara Karmarkar\*

Rotherham NHS Trust:

Clare Ball, Emily Calton, Louise Maxwell\*, Rachel Walker

Royal Blackburn Hospital:

Martin Bland, Lynne Bullock, Donna Harrison-Briggs, Paul Hodge, Anton Krige\*

University Hospital Aintree:

Ged Dempsey, Claire Hammell, Robert Loveridge, Robert Parker\*, Jane Snell, Carl Wright

Royal Bournemouth Hospital:

Andy Baker, Katharine Barr, Alex Belcher, Sam Bonnington, Anne-Marie Bougeard, Emma Fitzgerald, Rachael Ford, Chantal Gillard, Liz Griffiths, Lizzie Greenberg, Jonathan Huber, Steve Mathieu\*, Neil Richardson, Laura Tompsett, Nigel White

Royal Oldham Hospital:

Santosh Patel\*

Royal Hampshire County Hospital:

Victoria Corner, Richard Thomas\*, Dawn Trodd, Jennifer Wilson

Sandwell and West Birmingham Hospitals NHS Trust:

Ed Copley, Laura Flutter, Jonathan Hulme\*, Jay Susarla, Alison Thwaites

Royal Albert Edward Infirmary:

Suraj Jayasundera, Sean McAfee\*

Oxford Radcliffe Hospital:

Jonathan Chantler\*, Stuart McKechnie, Julia Neely

Southmead Hospital:

Ronelle Mouton\*, Edward Scarth, Jasmeet Soar

Darent Valley Hospital:

Joanne Buss, Vicki Currie, Mansoor Sange\*

Ashford and St Peters Hospitals NHS Trust:

Anja Kuttler\*, Fiona Power

Royal Orthopaedic Hospital NHS Trust:

David Alexander, Kevin Dunne, Guy Shinner\*

Hairmyres Hospital:

Euan Black, Grant Haldane\*

University Hospitals Coventry and Warwickshire:

Jennie Kerr, Taj Saran\*, Geraldine Ward

University Hospital of South Manchester:

Fiona Jefferies, Peter Alexander\*, Alison Royle

Dudley Group Hospitals NHS Trust:

Farid Nahla\*

Frenchay Hospital:

Tim Bowles, Maggie Gregory\*

University Hospital of North Staffordshire:

Rebecca Ahern, David Cartlidge, Lloyd Craker, Christopher Thompson\*

Queen Victoria Hospital NHS Trust:

Heena Bidd, Julian Giles\*, Amanda Manser

Princess of Wales Hospital:

Gareth Parry\*

Southend University Hospital:

Peter Chan, Dinesh Das, Nisreen Fahmy, David Higgins, Ahmed Khader\*, Alex Stone

Lewisham University Hospital:

Silvia Leonardi\*, Oliver Rose

West Suffolk Hospital:

Elizabeth Bright\*, Ari Ercole

Darlington Memorial Hospital:

Muhammed Amir Rafi\*, Radhika Ramasamy, Bengeri Sheshgiri

West Hertfordshire Hospitals NHS Trust:

Colin Merrill, Valerie Page\*, Elaine Walker

Musgrove Park Hospital:

Stephen Harris\*, Sarah Hughes

Wishaw General Hospital:

Alan Morrison\*, Khaled Razouk, Mustafa Ayman

St Georges Hospital NHS Trust:

Nawaf Al-Subaie, Fuhazia Arif, Jeremy Cashman, Maurizio Cecconi\*, Mark Edsell, Nicoletta Fossati, Sarah Jane Hammond, Mark Hamilton, Dagan Lonsdale, Carl Moran, Andrew Rhodes, Claas Siegmuller, Freya Velzeboer, Patrick Wong

Alexandra Hospital:

Alicia Jakeman, Chris Mowatt\*
